# Supplementary material
Source: Royal Society of Chemistry journal article supplement (doi:10.1039/d6cc01372d)
Supplement: d6cc01372d1.pdf [file d6cc01372d1.pdf]

## Electronic Supplementary Information

### **Oxidative coupling of 3-ethoxy Pd<sup>II</sup> N-confused porphyrins with $\beta$ - diketones using PIFA as the oxidant**

Jieqing Huang,<sup>a</sup> Wenrui Yang,<sup>a</sup> Sijie Wen,<sup>a</sup> Zenan Zheng,<sup>a</sup> Xiaolin Chen,<sup>a</sup> Xiaofan Gan,<sup>a</sup> Ling Xu,<sup>b</sup> and Hua-Wei Jiang\*<sup>a</sup>

a. School of Chemistry, South China Normal University, Guangzhou 510006, P. R. China E-mail: jiang@m.scnu.edu.cn.

b. Key Laboratory of Chemical Biology and Traditional Chinese Medicine Research, Ministry of Education, Key Laboratory of the Assembly and Application of Organic Functional Molecules of Hunan Province, College of Chemistry and Chemical Engineering, Hunan Normal University, Changsha 410081, China

\* Corresponding authors.

## **Content**

|                                                               |    |
|---------------------------------------------------------------|----|
| <b>1. General Information</b> .....                           | 3  |
| <b>2. Experimental Details and Characterization</b> .....     | 3  |
| <b>3. X-ray diffraction study</b> .....                       | 8  |
| <b>4. UV/Vis Absorption Spectra</b> .....                     | 11 |
| <b>5. NMR spectra</b> .....                                   | 11 |
| <b>6. Mass Spectrum</b> .....                                 | 19 |
| <b>7. Electrochemical Properties</b> .....                    | 23 |
| <b>8. Resonance Hybrid of the Oxidized Intermediate</b> ..... | 25 |
| <b>9. Calculations</b> .....                                  | 25 |

## 1. General Information

All chemicals that are commercially available were used without further purification unless otherwise noted. Thin-layer chromatography (TLC) was performed on silica gel plates (GF-254). Column chromatography was carried out by using silica gel (200–300 mesh).  $^1\text{H}$  and  $^{13}\text{C}$  NMR spectra were recorded on the Bruker AVANCE NEO 600 or JNM-ECZ500R/S1 spectrometer (operating as 600 MHz or 500 MHz for  $^1\text{H}$  and 151 MHz or 126 MHz for  $^{13}\text{C}$ ) using the residual solvent as the internal reference for  $^1\text{H}$  ( $\delta = 7.26$  ppm in  $\text{CDCl}_3$ ) and  $^{13}\text{C}$  ( $\delta = 77.16$  ppm in  $\text{CDCl}_3$ ). UV-vis spectra studies were performed on a Shimadzu UV-2700 spectrophotometer.

## 2. Experimental Details and Characterization

### Synthesis of C-3 ethoxy Ag(III) NCP

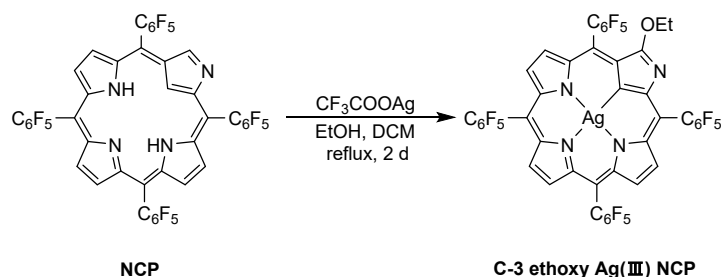

**Scheme S1.** Synthesis of C-3 ethoxy Ag(III) NCP

To a solution of NCP (50 mg, 0.05 mmol) in  $\text{CH}_2\text{Cl}_2$  (10 mL) were added the corresponding alcohol (2 mL) and  $\text{CF}_3\text{COOAg}$  (100 mg, 0.45 mmol). The mixture was stirred under reflux in air for 2 days. After cooling to room temperature, the reaction mixture was diluted with  $\text{CH}_2\text{Cl}_2$  and washed with water. The organic layer was dried over anhydrous  $\text{Na}_2\text{SO}_4$  and concentrated under reduced pressure. The crude product was purified by silica gel column chromatography to afford the **3-ethoxy Ag(III) NCP**.

**C-3 ethoxy Ag(III) NCP**: yield 75%.  $^1\text{H}$  NMR (600 MHz,  $\text{CDCl}_3$ ):  $\delta = 8.92$  (d,  $J = 4.9$  Hz, 1H,  $\beta$ -H), 8.88 (d,  $J = 4.9$  Hz, 1H,  $\beta$ -H), 8.79 (t,  $J = 5.2$  Hz, 3H,  $\beta$ -H), 8.72 (d,  $J = 4.9$  Hz, 2H,  $\beta$ -H), 4.87 (q,  $J = 7.2$  Hz, 2H,  $\text{OCH}_2\text{CH}_3$ ), 1.45 (t,  $J = 7.1$  Hz, 3H,  $\text{OCH}_2\text{CH}_3$ ).  $^{13}\text{C}$  NMR (151 MHz,  $\text{CDCl}_3$ ):  $\delta = 171.06, 151.92, 147.44, 145.80, 142.81, 142.12, 140.80, 139.36, 139.01, 139.00, 138.66, 138.65, 138.29, 138.21, 137.59, 136.69, 130.88, 129.32, 129.14, 128.99, 128.30, 127.87, 116.66, 115.41, 110.83, 106.96, 105.52, 103.72, 65.47, 14.27$ . **MS (MALDI)**  $m/z$ :  $[\text{M}+\text{H}]^+$  calcd for  $\text{C}_{46}\text{H}_{12}\text{ON}_4\text{AgF}_{20}^+$  1122.9737; found 1122.9707.

### Synthesis of compound C-3 ethoxy NCP

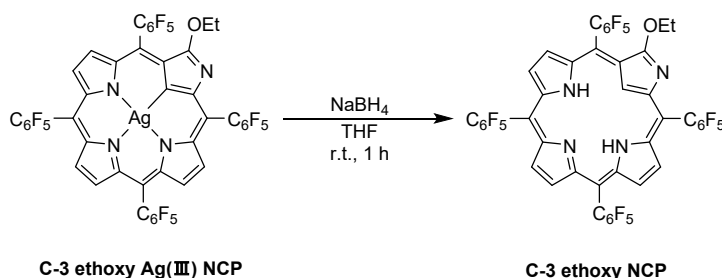

**Scheme S2.** Synthesis of C-3 ethoxy NCP

To a solution of **3-ethoxy Ag(III) NCP** (30 mg, 0.027 mmol) in THF (8 mL) was added a solution of NaBH<sub>4</sub> (71.2 mg, 1.88 mmol) in ethanol (6 mL). The resulting mixture was stirred at room temperature for 1 h. The reaction was then quenched by the addition of CH<sub>2</sub>Cl<sub>2</sub> and washed with water. The organic layer was separated, dried over Na<sub>2</sub>SO<sub>4</sub>, and concentrated under reduced pressure. The residue was purified by silica gel column chromatography. The green fraction was collected and concentrated, and the product was recrystallized from CH<sub>2</sub>Cl<sub>2</sub>/n-hexane to afford violet crystals.

**C-3 ethoxy NCP**: yield 64%. <sup>1</sup>H NMR (600 MHz, CDCl<sub>3</sub>): δ = 8.81 (t, *J* = 4.8 Hz, 2H, β-H), 8.65 (d, *J* = 5.0 Hz, 1H, β-H), 8.61 (d, *J* = 4.8 Hz, 2H, β-H), 8.55 (d, *J* = 4.8 Hz, 1H, β-H), 4.69 (q, *J* = 7.2 Hz, 2H, OCH<sub>2</sub>CH<sub>3</sub>), 1.35 (t, *J* = 7.1 Hz, 3H, OCH<sub>2</sub>CH<sub>3</sub>), -2.52 (d, *J* = 106.6 Hz, 2H, inner-NH), -5.36 (s, 1H, 21C-H). <sup>13</sup>C NMR (151 MHz, CDCl<sub>3</sub>): δ = 169.99, 156.93, 154.75, 149.52, 139.30, 138.44, 137.13, 136.90, 134.84, 133.75, 128.14, 127.94, 126.45, 126.03, 124.91, 107.93, 105.55, 104.26, 103.32, 100.79, 66.09, 14.23. **MS (MALDI)** m/z: [M+H]<sup>+</sup> calcd for C<sub>46</sub>H<sub>15</sub>ON<sub>4</sub>F<sub>20</sub><sup>+</sup> 1019.0921; found 1019.0883.

#### Synthesis of compound **Pd1**

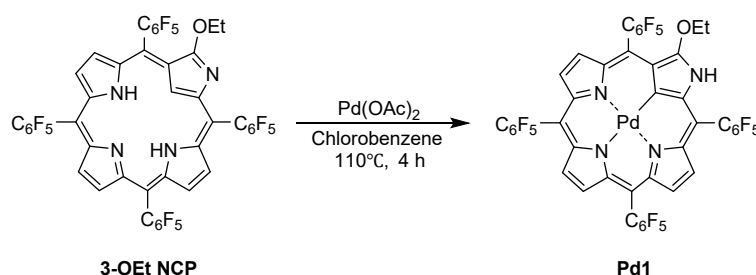

**Scheme S3.** Synthesis of **Pd1**

**3-Ethoxy NCP** (50 mg, 0.05 mmol) and Pd(OAc)<sub>2</sub> (33.7 mg, 0.15 mmol) were dissolved in chlorobenzene (20 mL). The mixture was stirred at 110 °C for 4 h. After removal of the solvent under reduced pressure, the residue was purified by flash column chromatography on silica gel. Recrystallization from CH<sub>2</sub>Cl<sub>2</sub>/n-hexane afforded **Pd1** as a purple-black solid.

**Pd1**: yield 51%. <sup>1</sup>H NMR (600 MHz, CDCl<sub>3</sub>): δ = 9.31 (s, 1H, outer-NH), 8.31 (d, *J* = 5.0 Hz, 1H, β-H), 8.23 (d, *J* = 4.9 Hz, 1H, β-H), 8.20 (d, *J* = 5.1 Hz, 1H, β-H), 8.18 (m, 3H, β-H), 4.80 (q, *J* = 7.0 Hz, 2H, OCH<sub>2</sub>CH<sub>3</sub>), 1.54 (t, *J* = 7.0 Hz, 3H, OCH<sub>2</sub>CH<sub>3</sub>). <sup>13</sup>C NMR (151 MHz, CDCl<sub>3</sub>): δ = 168.74, 147.76, 147.24, 144.25, 143.87, 142.73, 139.81, 132.80, 131.11, 130.37, 129.67, 128.38, 127.95, 127.44, 125.74, 112.14, 111.23, 106.91, 104.69, 101.86, 69.36, 14.00. **MS (MALDI)** m/z: [M]<sup>+</sup> calcd for C<sub>46</sub>H<sub>12</sub>ON<sub>4</sub>F<sub>20</sub>Pd<sup>+</sup> 1121.9721; found 1121.9722. **UV/Vis** (CH<sub>2</sub>Cl<sub>2</sub>): λ<sub>max</sub> (lg ε) = 452 (4.84), 535 (3.89), 573 (3.87), 620 (3.72) and 668 nm (3.92).

### Synthesis of compound **Pd1a**

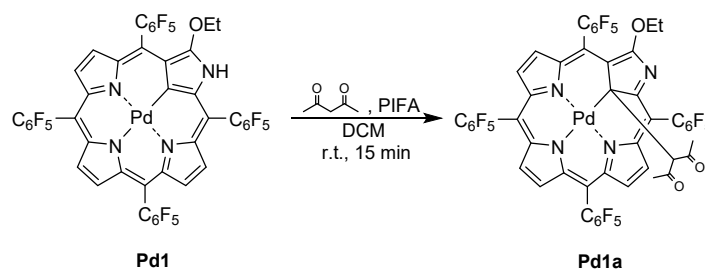

**Scheme S4.** Synthesis of **Pd1a**

**Pd1** (30 mg, 0.027 mmol), PIFA (17.4 mg, 0.04 mmol) and acetylacetone (0.06 mL) were combined in  $\text{CH}_2\text{Cl}_2$  (10 mL). The mixture was stirred at room temperature for 15 min, then diluted with additional  $\text{CH}_2\text{Cl}_2$  and washed with saturated aqueous NaCl solution. The organic layer was dried over anhydrous  $\text{Na}_2\text{SO}_4$  and concentrated under reduced pressure. The residue was purified by flash column chromatography on silica gel to afford **Pd1a**.

**Pd1a**: yield 73%.  $^1\text{H NMR}$  (600 MHz,  $\text{CDCl}_3$ ):  $\delta$  = 8.41 (d,  $J$  = 5.0 Hz, 1H,  $\beta$ -H), 8.37 (m, 2H,  $\beta$ -H), 8.34 (d,  $J$  = 4.0 Hz, 1H,  $\beta$ -H), 8.33 (d,  $J$  = 4.8 Hz, 1H,  $\beta$ -H), 8.27 (d,  $J$  = 4.6 Hz, 1H,  $\beta$ -H), 5.05 (m, 1H,  $\text{OCH}_2\text{CH}_3$ ), 4.61 (m, 1H,  $\text{OCH}_2\text{CH}_3$ ), 1.37 (t,  $J$  = 7.1 Hz, 3H,  $\text{OCH}_2\text{CH}_3$ ), 0.59 (s, 3H,  $\text{CH}(\text{COCH}_3)_2$ ), -0.29 (s, 3H,  $\text{CH}(\text{COCH}_3)_2$ ), -0.57 (s, 1H,  $\text{CH}(\text{COCH}_3)_2$ ).  $^{13}\text{C NMR}$  (151 MHz,  $\text{CDCl}_3$ ):  $\delta$  = 194.74, 194.69, 180.56, 172.76, 155.89, 152.24, 145.13, 144.46, 142.76, 142.66, 139.10, 135.55, 133.48, 131.07, 130.88, 130.14, 129.07, 117.56, 114.07, 109.82, 69.23, 67.87, 43.64, 28.91, 28.73, 14.21. **MS (MALDI)**  $m/z$ :  $[\text{M}]^+$  calcd for  $\text{C}_{51}\text{H}_{18}\text{O}_3\text{N}_4\text{F}_{20}\text{Pd}^+$  1220.0089; found 1220.0098. **UV/Vis** ( $\text{CH}_2\text{Cl}_2$ ):  $\lambda_{\text{max}}$  (lg  $\epsilon$ ) = 358 (4.50), 424 (4.54), 465 (4.50), 514 (4.22) and 681 nm (4.31).

### Synthesis of compound **Pd1b**

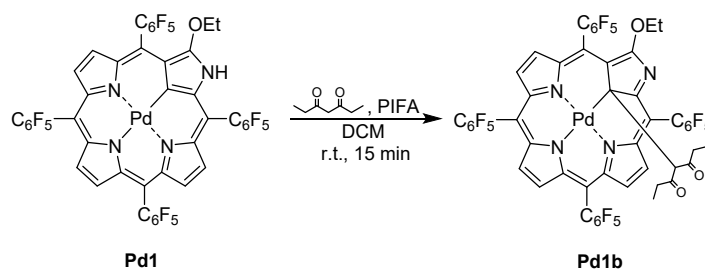

**Scheme S5.** Synthesis of **Pd1b**

**Pd1** (30 mg, 0.027 mmol), PIFA (17.4 mg, 0.04 mmol) and 3,5-heptanedione (0.08 mL) were combined in  $\text{CH}_2\text{Cl}_2$  (10 mL). The mixture was stirred at room temperature for 15 min, then diluted with additional  $\text{CH}_2\text{Cl}_2$  and washed with saturated aqueous NaCl solution. The organic layer was dried over anhydrous  $\text{Na}_2\text{SO}_4$  and concentrated under reduced pressure. The residue was purified by flash column chromatography on silica gel to afford **Pd1b**.

**Pd1b**: yield 66%.  $^1\text{H NMR}$  (600 MHz,  $\text{CDCl}_3$ ):  $\delta$  = 8.41 (d,  $J$  = 5.0 Hz, 1H,  $\beta$ -H), 8.36 (m, 3H,  $\beta$ -H), 8.31 (d,  $J$  = 4.7 Hz, 1H,  $\beta$ -H), 8.27 (d,  $J$  = 4.7 Hz, 1H,  $\beta$ -H), 5.01 (m, 1H,  $\text{OCH}_2\text{CH}_3$ ), 4.58 (m, 1H,  $\text{OCH}_2\text{CH}_3$ ), 1.33 (t,  $J$  = 7.4 Hz, 3H,  $\text{OCH}_2\text{CH}_3$ ), 0.75 (m, 1H,  $\text{CH}(\text{COCH}_2\text{CH}_3)_2$ ), 0.64 (m, 1H,  $\text{CH}(\text{COCH}_2\text{CH}_3)_2$ ), 0.19 (m, 1H,  $\text{CH}(\text{COCH}_2\text{CH}_3)_2$ ), 0.15 (t,  $J$  = 7.1 Hz, 3H,  $\text{CH}(\text{COCH}_2\text{CH}_3)_2$ ), -

0.22 (m, 1H,  $\text{CH}(\text{COCH}_2\text{CH}_3)_2$ ), -0.61 (s, 1H,  $\underline{\text{CH}}(\text{COCH}_2\text{CH}_3)_2$ ), -0.81 (t,  $J = 6.8$  Hz, 3H,  $\text{CH}(\text{COCH}_2\text{CH}_3)_2$ ).  $^{13}\text{C}$  NMR (151 MHz,  $\text{CDCl}_3$ ):  $\delta = 197.01, 180.88, 172.58, 155.82, 152.37, 146.85, 145.05, 144.31, 142.93, 142.59, 139.79, 135.40, 133.13, 130.93, 130.70, 130.00, 129.09, 117.77, 114.07, 109.75, 67.83, 67.80, 43.79, 35.58, 35.10, 29.85, 14.18, 6.74, 5.58$ . **MS (MALDI)**  $m/z$ :  $[\text{M}]^+$  calcd for  $\text{C}_{53}\text{H}_{23}\text{O}_3\text{N}_4\text{F}_{20}\text{Pd}^+$  1249.0480; found 1249.0470. **UV/Vis** ( $\text{CH}_2\text{Cl}_2$ ):  $\lambda_{\text{max}}$  ( $\lg \epsilon$ ) = 358 (4.47), 427 (4.53), 465 (4.48), 513 (4.19) and 681 nm (4.29).

#### Synthesis of compound **Pd2**

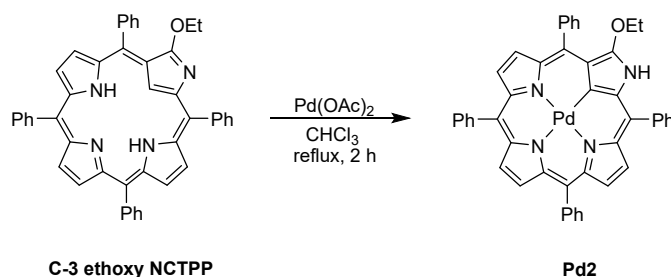

**Scheme S6.** Synthesis of **Pd2**

C-3-Ethoxy NCTPP (100 mg, 0.15 mmol) and  $\text{Pd}(\text{OAc})_2$  (101.0 mg, 0.45 mmol) were combined in chloroform (15 mL). The mixture was stirred at 60 °C for 2 h. After removal of the solvent under reduced pressure, the residue was purified by flash column chromatography on silica gel. Recrystallization from  $\text{CH}_2\text{Cl}_2$ /n-hexane afforded **Pd2** as a purple-black solid.

**Pd2**: yield 46%.  $^1\text{H}$  NMR (600 MHz,  $\text{CDCl}_3$ ):  $\delta = 9.32$  (s, 1H,  $\beta$ -H), 8.22 (d,  $J = 4.8$  Hz, 1H,  $\beta$ -H), 8.19 (m, 3H,  $\beta$ -H), 8.16 (d,  $J = 4.9$  Hz, 1H,  $\beta$ -H), 8.13 (d,  $J = 4.8$  Hz, 1H,  $\beta$ -H), 8.04-7.97 (m, 6H, Ar-H), 7.79 (d,  $J = 6.5$  Hz, 2H, Ar-H), 7.69-7.53 (m, 12H, Ar-H), 4.31 (q,  $J = 6.9$  Hz, 2H,  $\text{OCH}_2\text{CH}_3$ ), 1.15 (t,  $J = 6.9$  Hz, 3H,  $\text{OCH}_2\text{CH}_3$ ).  $^{13}\text{C}$  NMR (151 MHz,  $\text{CDCl}_3$ ):  $\delta = 167.78, 147.36, 146.31, 144.48, 143.49, 142.91, 142.87, 142.56, 141.42, 139.87, 138.99, 133.90, 133.82, 132.85, 132.33, 131.69, 130.69, 130.20, 129.31, 129.19, 128.30, 128.03, 128.01, 127.69, 127.19, 126.84, 126.81, 126.72, 125.77, 124.57, 122.91, 120.72, 118.55, 111.88, 67.46, 13.79$ . **MS (MALDI)**  $m/z$ :  $[\text{M}]^+$  calcd for  $\text{C}_{46}\text{H}_{32}\text{N}_4\text{OPd}^+$  762.1622; found 762.1550. **UV/Vis** ( $\text{CH}_2\text{Cl}_2$ ):  $\lambda_{\text{max}}$  ( $\lg \epsilon$ ) = 451 (5.02), 528 (3.97), 570 (3.60), 619 (3.78) and 667 nm (4.06).

#### Synthesis of compound **Pd2a**

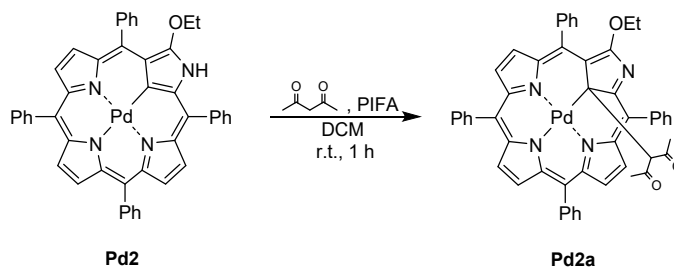

**Scheme S7.** Synthesis of **Pd2a**

**Pd2** (50 mg, 0.07 mmol), PIFA (42.3 mg, 0.10 mmol) and acetylacetone (0.05 mL) were combined in  $\text{CH}_2\text{Cl}_2$  (7 mL). The mixture was stirred at room temperature for 1 h, then diluted with additional  $\text{CH}_2\text{Cl}_2$  and washed with saturated aqueous NaCl solution. The organic layer was

dried over anhydrous Na<sub>2</sub>SO<sub>4</sub> and concentrated under reduced pressure. The residue was purified by flash column chromatography on silica gel to afford **Pd2a**.

**Pd2a**: yield 62%. <sup>1</sup>H NMR (600 MHz, CDCl<sub>3</sub>): δ = 8.68 (s, 1H, Ar-H), 8.50 (d, *J* = 4.9 Hz, 1H, β-H), 8.46 (d, *J* = 4.9 Hz, 1H, β-H), 8.41 (d, *J* = 4.8 Hz, 1H, β-H), 8.37 (d, *J* = 4.7 Hz, 1H, β-H), 8.30 (d, *J* = 4.6 Hz, 1H, β-H), 8.27 (d, *J* = 4.6 Hz, 1H, β-H), 8.15 (m, 2H, Ar-H), 8.09 (d, *J* = 6.7 Hz, 1H, Ar-H), 7.97 (d, *J* = 7.4 Hz, 1H, Ar-H), 7.76-7.61 (m, 15H, Ar-H), 4.81 (m, 1H, OCH<sub>2</sub>CH<sub>3</sub>), 4.10 (m, 1H, OCH<sub>2</sub>CH<sub>3</sub>), 1.09 (t, *J* = 7.0 Hz, 3H, OCH<sub>2</sub>CH<sub>3</sub>), 0.72 (s, 3H, CH(COCH<sub>3</sub>)<sub>2</sub>), -0.34 (s, 3H, CH(COCH<sub>3</sub>)<sub>2</sub>), -0.71 (s, 1H, CH(COCH<sub>3</sub>)<sub>2</sub>). <sup>13</sup>C NMR (151 MHz, CDCl<sub>3</sub>): δ = 197.01, 196.94, 176.92, 171.17, 155.37, 152.55, 145.37, 145.26, 144.05, 143.69, 141.52, 141.44, 141.18, 140.77, 136.15, 135.71, 134.94, 134.41, 134.33, 134.15, 133.76, 133.47, 132.94, 131.50, 130.53, 130.47, 130.32, 129.52, 128.23, 128.14, 128.11, 127.72, 127.50, 127.08, 126.94, 126.87, 126.14, 124.29, 77.37, 77.16, 76.95, 69.77, 65.98, 42.86, 29.96, 29.11, 14.22. **MS (MALDI)** m/z: [M+H]<sup>+</sup> calcd for C<sub>51</sub>H<sub>39</sub>O<sub>3</sub>N<sub>4</sub>Pd<sup>+</sup> 861.2052; found 861.2065. **UV/Vis** (CH<sub>2</sub>Cl<sub>2</sub>): λ<sub>max</sub> (lg ε) = 363 (4.44), 421 (4.44), 477 (4.61), 502 (4.39) and 685 nm (3.98).

Synthesis of compound **Pd2b**

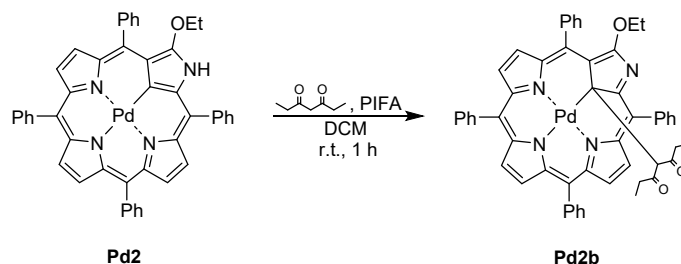

**Scheme S8.** Synthesis of **Pd2b**

**Pd2** (50 mg, 0.07 mmol), PIFA (42.3 mg, 0.10 mmol) and 3,5-heptanedione (0.07 mL) were combined in CH<sub>2</sub>Cl<sub>2</sub> (7 mL). The mixture was stirred at room temperature for 1 h, then diluted with additional CH<sub>2</sub>Cl<sub>2</sub> and washed with saturated aqueous NaCl solution. The organic layer was dried over anhydrous Na<sub>2</sub>SO<sub>4</sub> and concentrated under reduced pressure. The residue was purified by flash column chromatography on silica gel to afford **Pd2b**.

**Pd2b**: yield 60%. <sup>1</sup>H NMR (500 MHz, CDCl<sub>3</sub>): δ = 8.79 (s, 1H, Ar-H), 8.53 (d, *J* = 5.0 Hz, 1H, β-H), 8.48 (d, *J* = 5.0 Hz, 1H, β-H), 8.45 (d, *J* = 4.8 Hz, 1H, β-H), 8.35 (d, *J* = 4.8 Hz, 1H, β-H), 8.30 (d, *J* = 4.6 Hz, 1H, β-H), 8.28 (d, *J* = 4.6 Hz, 1H, β-H), 8.16 (d, *J* = 6.5 Hz, 1H, Ar-H), 8.10 (d, *J* = 7.1 Hz, 2H, Ar-H), 7.99 (d, *J* = 7.4 Hz, 1H, Ar-H), 7.80-7.60 (m, 15H, Ar-H), 4.80 (m, 1H, OCH<sub>2</sub>CH<sub>3</sub>), 4.08 (m, 1H, OCH<sub>2</sub>CH<sub>3</sub>), 1.05 (t, *J* = 7.1 Hz, 3H, OCH<sub>2</sub>CH<sub>3</sub>), 0.92 (m, 1H, CH(COCH<sub>2</sub>CH<sub>3</sub>)<sub>2</sub>), 0.81 (m, 1H, CH(COCH<sub>2</sub>CH<sub>3</sub>)<sub>2</sub>), 0.32 (t, *J* = 7.1 Hz, 3H, CH(COCH<sub>2</sub>CH<sub>3</sub>)<sub>2</sub>), -0.03 (m, 1H, CH(COCH<sub>2</sub>CH<sub>3</sub>)<sub>2</sub>), -0.33 (m, 1H, CH(COCH<sub>2</sub>CH<sub>3</sub>)<sub>2</sub>), -0.73 (s, 1H, CH(COCH<sub>2</sub>CH<sub>3</sub>)<sub>2</sub>), -0.87 (t, *J* = 7.1 Hz, 3H, CH(COCH<sub>2</sub>CH<sub>3</sub>)<sub>2</sub>). <sup>13</sup>C NMR (126 MHz, CDCl<sub>3</sub>): δ = 198.58, 198.21, 177.32, 171.09, 154.97, 152.61, 145.29, 145.03, 144.09, 143.57, 141.56, 141.48, 141.21, 140.70, 136.29, 134.73, 134.29, 133.87, 133.68, 133.31, 132.61, 131.28, 130.37, 130.32, 130.02, 129.53, 128.14, 128.07, 128.00, 127.69, 127.42, 127.04, 126.87, 126.80, 125.94, 123.95, 67.67, 65.87, 42.97, 36.20, 35.48, 31.68, 22.75, 14.11, 7.17, 5.77. **MS (MALDI)** m/z: [M+H]<sup>+</sup> calcd for C<sub>53</sub>H<sub>43</sub>O<sub>3</sub>N<sub>4</sub>Pd<sup>+</sup> 889.2365; found 889.2379. **UV/Vis** (CH<sub>2</sub>Cl<sub>2</sub>): λ<sub>max</sub> (lg ε) = 363 (4.44), 422 (4.39), 477 (4.62), 502 (4.40) and 685 nm (4.00).

### 3. X-ray diffraction study

The single crystals of **Pd1** were obtained by vapor diffusion of n-hexane into its CHCl<sub>3</sub> solution at room temperature. Single-crystal X-ray diffraction analysis data were collected at 172 K with a Bruker APEX-II CCD diffractometer by using graphite monochromatic Mo-K $\alpha$  radiation ( $\lambda = 0.71073$  Å). The structures were solved by direct methods using ShelXS and refined using a full-matrix least-squares technique based on  $F^2$  within ShelXL 2018 and OLEX-2.<sup>25</sup> Crystal data are compiled in Table S1.

The single crystals of **Pd2** were obtained by vapor diffusion of butanol into its CHCl<sub>3</sub> solution at room temperature. Single-crystal X-ray diffraction analysis data were collected at 150 K with a Bruker APEX-II CCD diffractometer by using graphite monochromatic Cu-K $\alpha$  radiation ( $\lambda = 1.54178$  Å). The structures were solved by direct methods using ShelXS and refined using a full-matrix least-squares technique based on  $F^2$  within ShelXL 2018 and OLEX-2. Crystal data are compiled in Table S1.

**Table S1.** Crystal data and structure refinement for **Pd1a** and **Pd2a**.

|                                        | Compound <b>Pd1a</b>                                                             | Compound <b>Pd2a</b>                                                                           |
|----------------------------------------|----------------------------------------------------------------------------------|------------------------------------------------------------------------------------------------|
| CCDC <sup>a</sup>                      | 2529281                                                                          | 2529282                                                                                        |
| Empirical formula                      | C <sub>55</sub> H <sub>24</sub> F <sub>20</sub> N <sub>4</sub> O <sub>3</sub> Pd | C <sub>103</sub> H <sub>77</sub> Cl <sub>3</sub> N <sub>8</sub> O <sub>6</sub> Pd <sub>2</sub> |
| Formula weight                         | 1275.18                                                                          | 1841.87                                                                                        |
| Temperature/K                          | 150.00                                                                           | 240.15                                                                                         |
| Crystal system                         | triclinic                                                                        | triclinic                                                                                      |
| Space group                            | P-1                                                                              | P-1                                                                                            |
| a/Å                                    | 13.0937(6)                                                                       | 10.478(2)                                                                                      |
| b/Å                                    | 13.6141(6)                                                                       | 14.544(3)                                                                                      |
| c/Å                                    | 15.2325(7)                                                                       | 14.623(3)                                                                                      |
| $\alpha$ /°                            | 105.165(2)                                                                       | 80.817(15)                                                                                     |
| $\beta$ /°                             | 106.252(2)                                                                       | 73.450(17)                                                                                     |
| $\gamma$ /°                            | 93.443(3)                                                                        | 83.659(17)                                                                                     |
| Volume/Å <sup>3</sup>                  | 2489.9(2)                                                                        | 2103.8(8)                                                                                      |
| Z                                      | 2                                                                                | 1                                                                                              |
| $\rho_{\text{calc}}/\text{cm}^3$       | 1.701                                                                            | 1.454                                                                                          |
| $\mu/\text{mm}^{-1}$                   | 4.155                                                                            | 4.831                                                                                          |
| F(000)                                 | 1264.0                                                                           | 942.0                                                                                          |
| Crystal size/mm <sup>3</sup>           | 0.12 × 0.11 × 0.08                                                               | 0.15 × 0.11 × 0.1                                                                              |
| Radiation                              | Cu K $\alpha$ ( $\lambda = 1.54178$ )                                            | Cu K $\alpha$ ( $\lambda = 1.54178$ )                                                          |
| 2 $\Theta$ range for data collection/° | 6.798 to 133.186                                                                 | 6.17 to 117.86                                                                                 |

|                                                |                                                               |                                                               |
|------------------------------------------------|---------------------------------------------------------------|---------------------------------------------------------------|
| Index ranges                                   | $-15 \leq h \leq 15, -16 \leq k \leq 16, -18 \leq l \leq 18$  | $-10 \leq h \leq 11, -16 \leq k \leq 16, -14 \leq l \leq 16$  |
| Reflections collected                          | 33593                                                         | 15131                                                         |
| Independent reflections                        | 8713 [ $R_{\text{int}} = 0.0687, R_{\text{sigma}} = 0.0608$ ] | 5806 [ $R_{\text{int}} = 0.0874, R_{\text{sigma}} = 0.0950$ ] |
| Data/restraints/parameters                     | 8713/0/753                                                    | 5806/33/571                                                   |
| Goodness-of-fit on $F^2$                       | 1.118                                                         | 1.151                                                         |
| Final R indexes [ $I \geq 2\sigma(I)$ ]        | $R_1 = 0.0729, W_{R_2} = 0.2110$                              | $R_1 = 0.0934, W_{R_2} = 0.2381$                              |
| Final R indexes [all data]                     | $R_1 = 0.0772, W_{R_2} = 0.2173$                              | $R_1 = 0.1612, W_{R_2} = 0.3161$                              |
| Largest diff. peak/hole / $e \text{ \AA}^{-3}$ | 2.07/-1.70                                                    | 1.07/-2.63                                                    |

a: CCDC 2529281 and 2529282 contains the supplementary crystallographic data for this paper. These data can be obtained free of charge via [www.ccdc.cam.ac.uk/data\\_request/cif](http://www.ccdc.cam.ac.uk/data_request/cif), or by emailing [data\\_request@ccdc.cam.ac.uk](mailto:data_request@ccdc.cam.ac.uk), or by contacting The Cambridge Crystallographic Data Centre, 12 Union Road, Cambridge CB2 1EZ, UK; fax: +44 1223 336033.

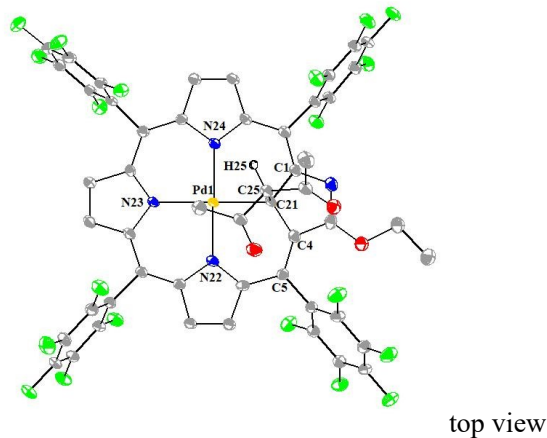

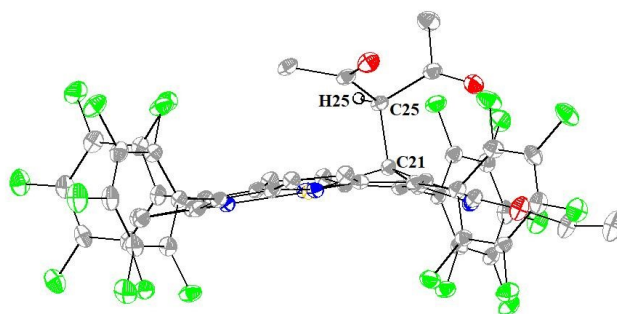

side view

**Figure S1.** X-ray crystal structure of **Pd1a**. Solvent molecules and all hydrogen atoms except for H25 are omitted for clarity.

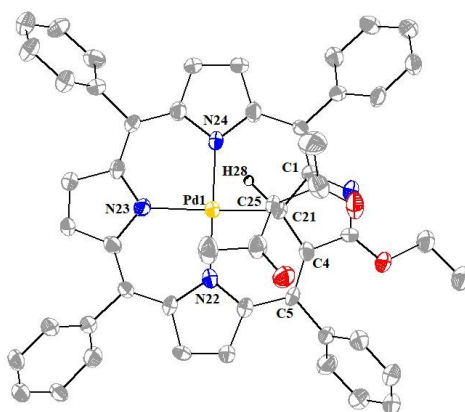

top view

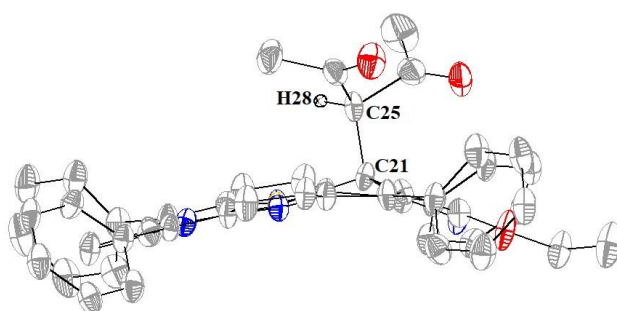

side view

**Figure S2.** X-ray crystal structure of **Pd2a**. Solvent molecules and all hydrogen atoms except for H28 are omitted for clarity.

#### 4. UV/Vis Absorption Spectra

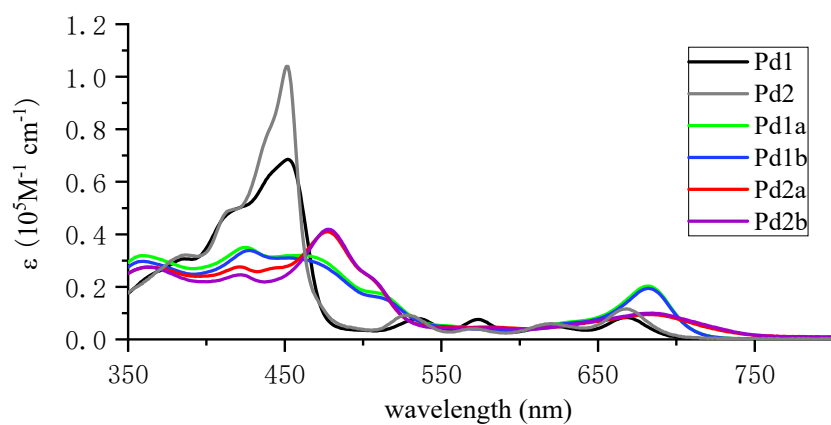

Figure S3. UV-vis absorption spectra of Compound Pd1, Pd2, Pd1a-b, and Pd2a-b in  $\text{CH}_2\text{Cl}_2$ .

#### 5. NMR spectra

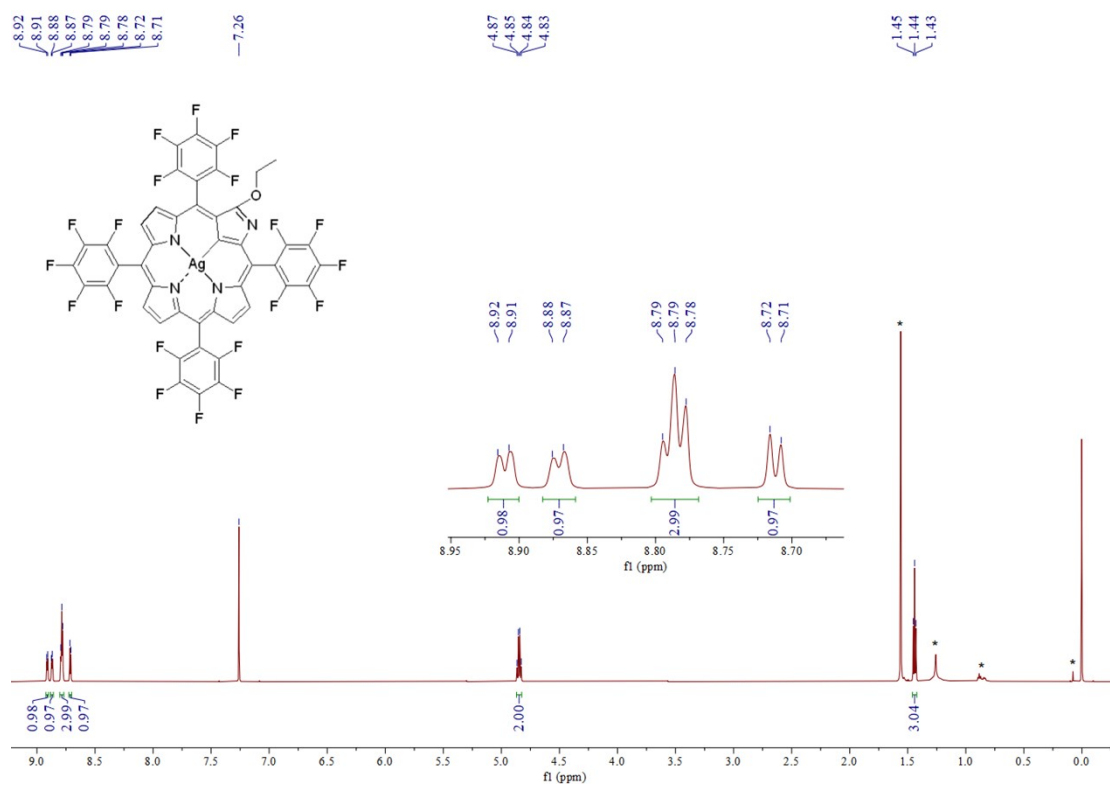

Figure S4.  $^1\text{H}$  NMR (600 MHz,  $\text{CDCl}_3$ ) spectrum of C-3 ethoxy Ag(III) NCP. [\*] solvent impurities

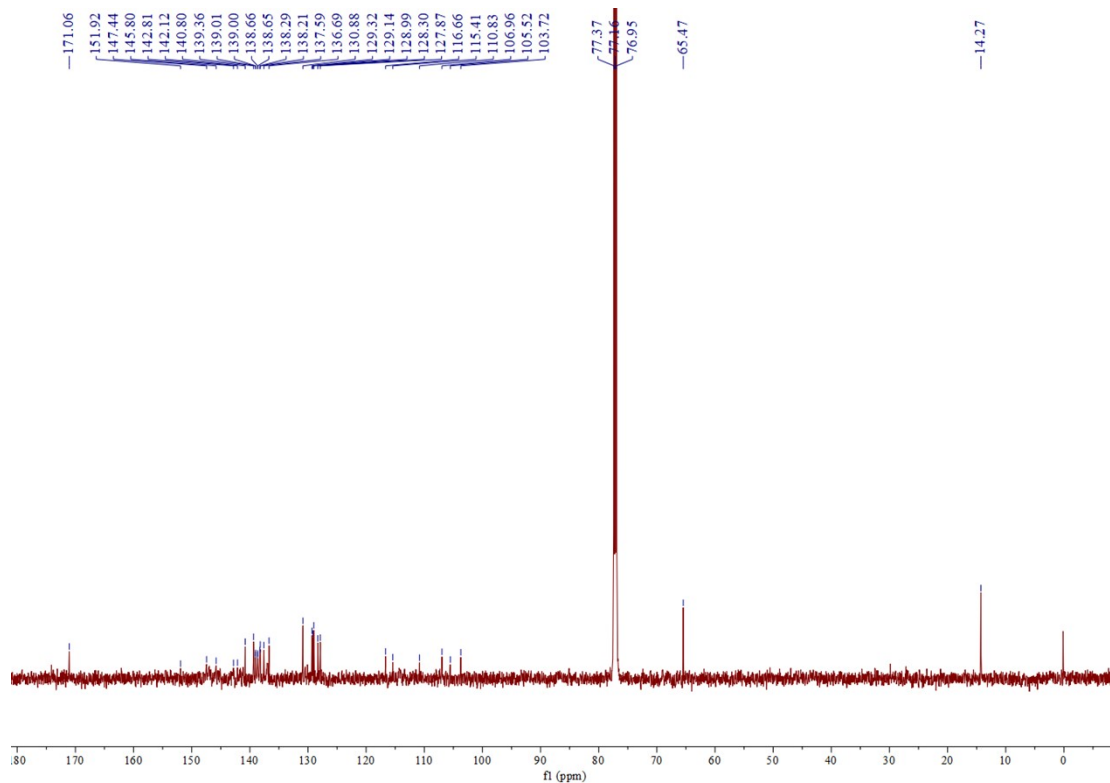

Figure S5.  $^{13}\text{C}$  NMR (151 MHz,  $\text{CDCl}_3$ ) spectrum of C-3 ethoxy Ag(III) NCP. [\*] solvent impurities

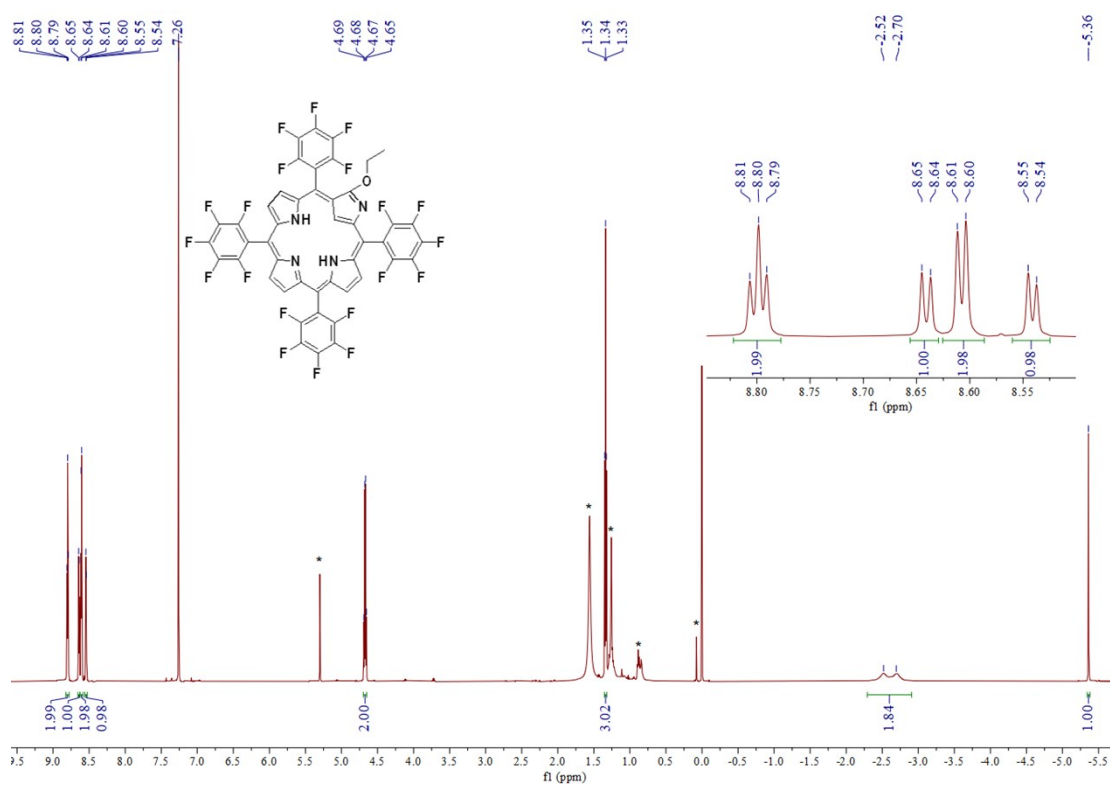

Figure S6.  $^1\text{H}$  NMR (600 MHz,  $\text{CDCl}_3$ ) spectrum of C-3 ethoxy NCP. [\*] solvent impurities

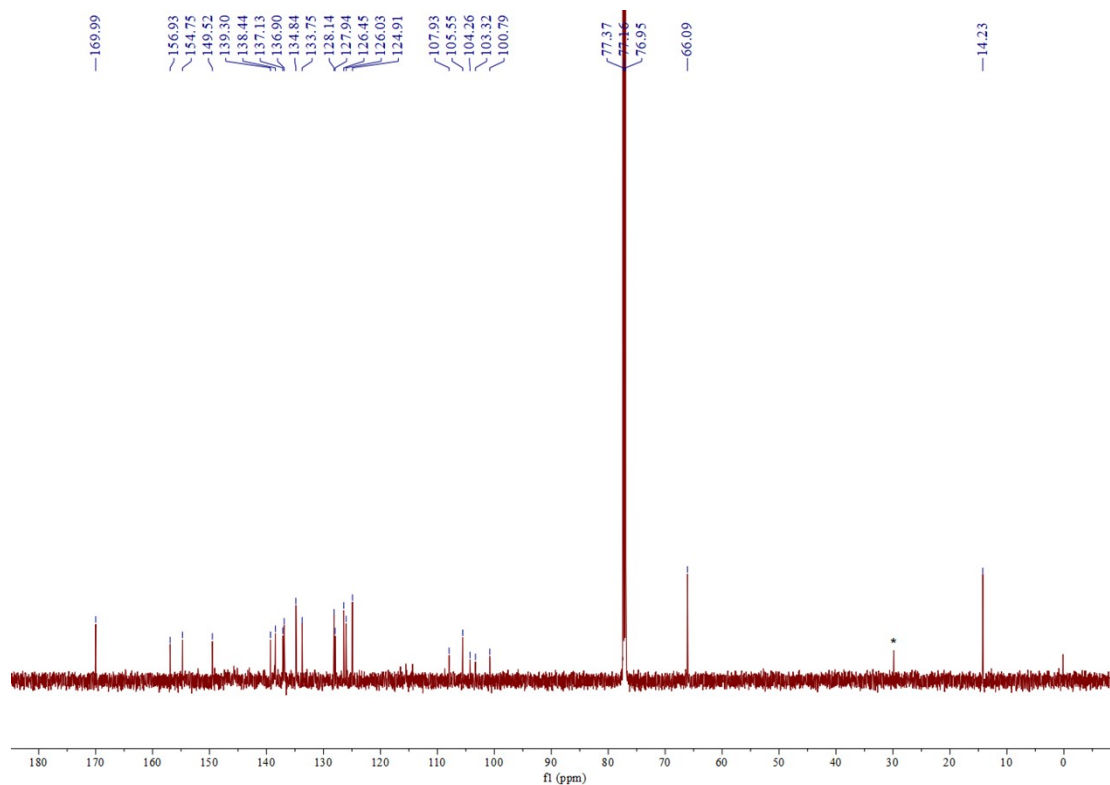

**Figure S7.**  $^{13}\text{C}$  NMR (151 MHz,  $\text{CDCl}_3$ ) spectrum of C-3 ethoxy NCP. [\*] solvent impurities

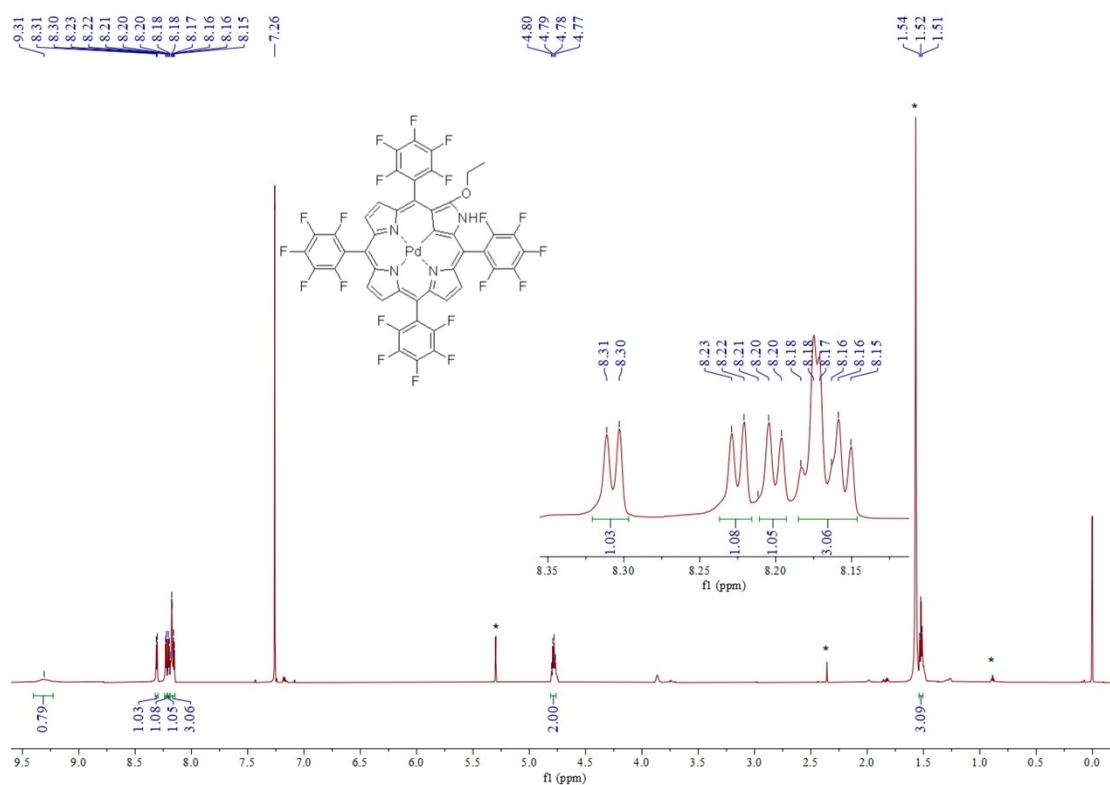

**Figure S8.**  $^1\text{H}$  NMR (600 MHz,  $\text{CDCl}_3$ ) spectrum of Pd1. [\*] solvent impurities

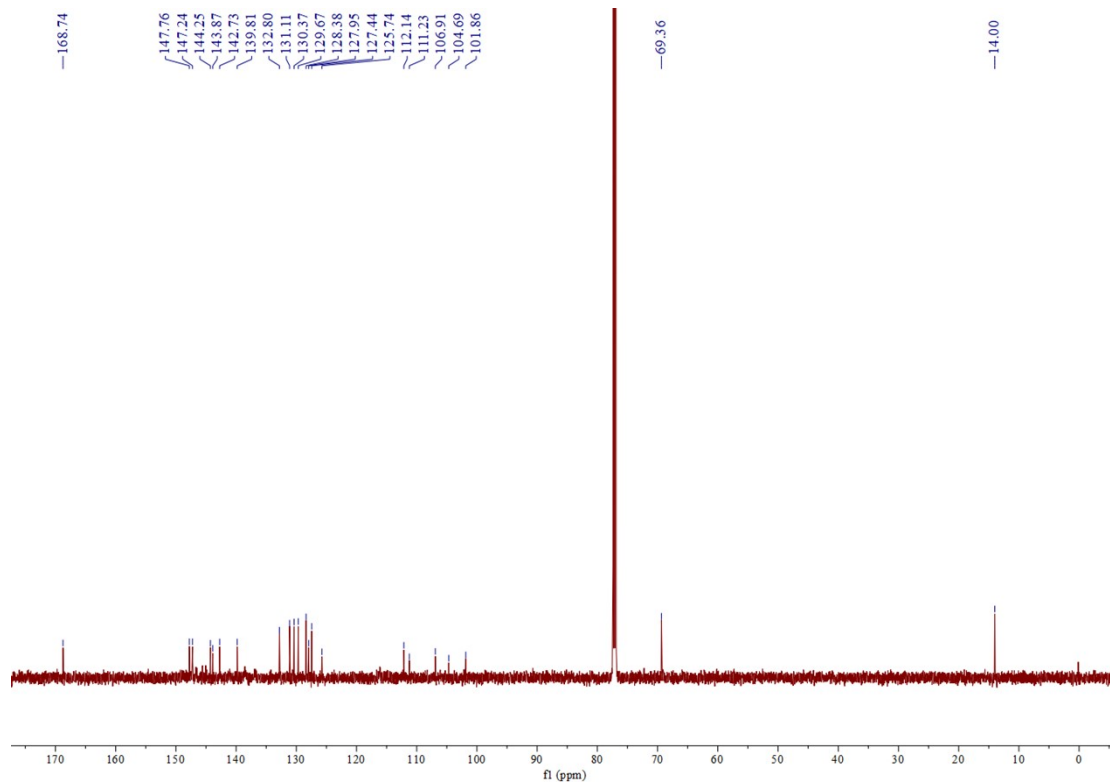

Figure S9.  $^{13}\text{C}$  NMR (151 MHz,  $\text{CDCl}_3$ ) spectrum of Pd1. [\*] solvent impurities

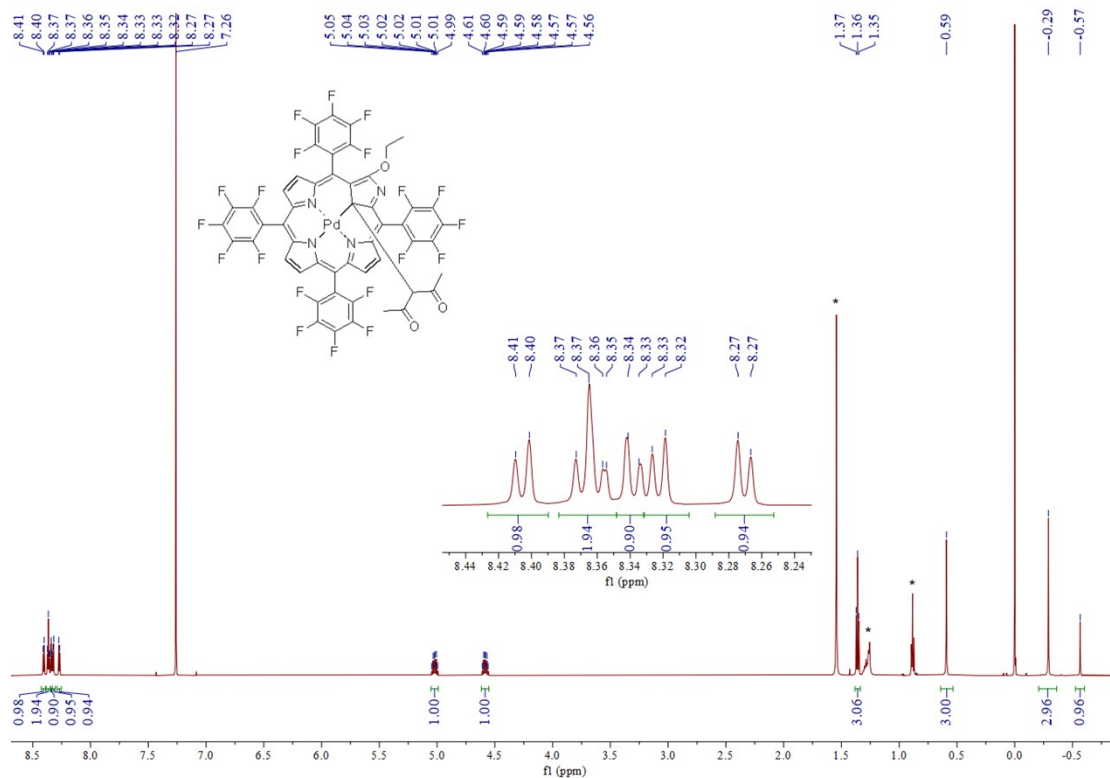

Figure S10.  $^1\text{H}$  NMR (600 MHz,  $\text{CDCl}_3$ ) spectrum of Pd1a. [\*] solvent impurities

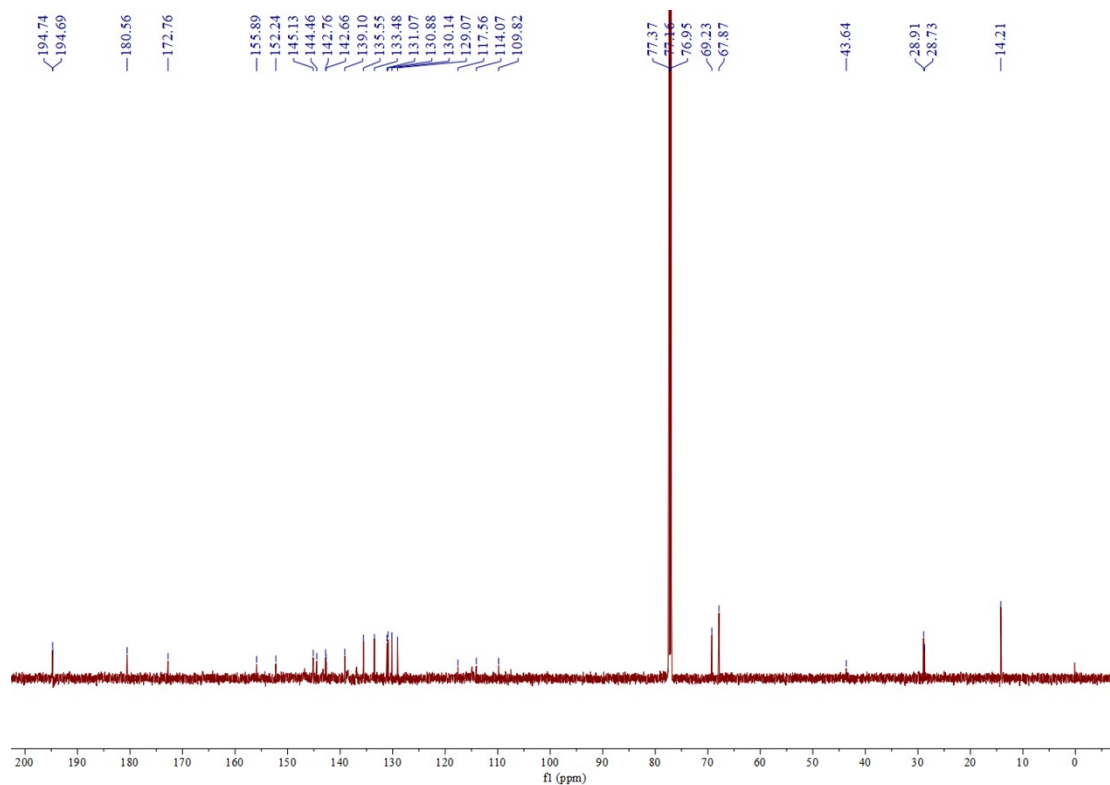

Figure S11.  $^{13}\text{C}$  NMR (151 MHz,  $\text{CDCl}_3$ ) spectrum of Pd1a.

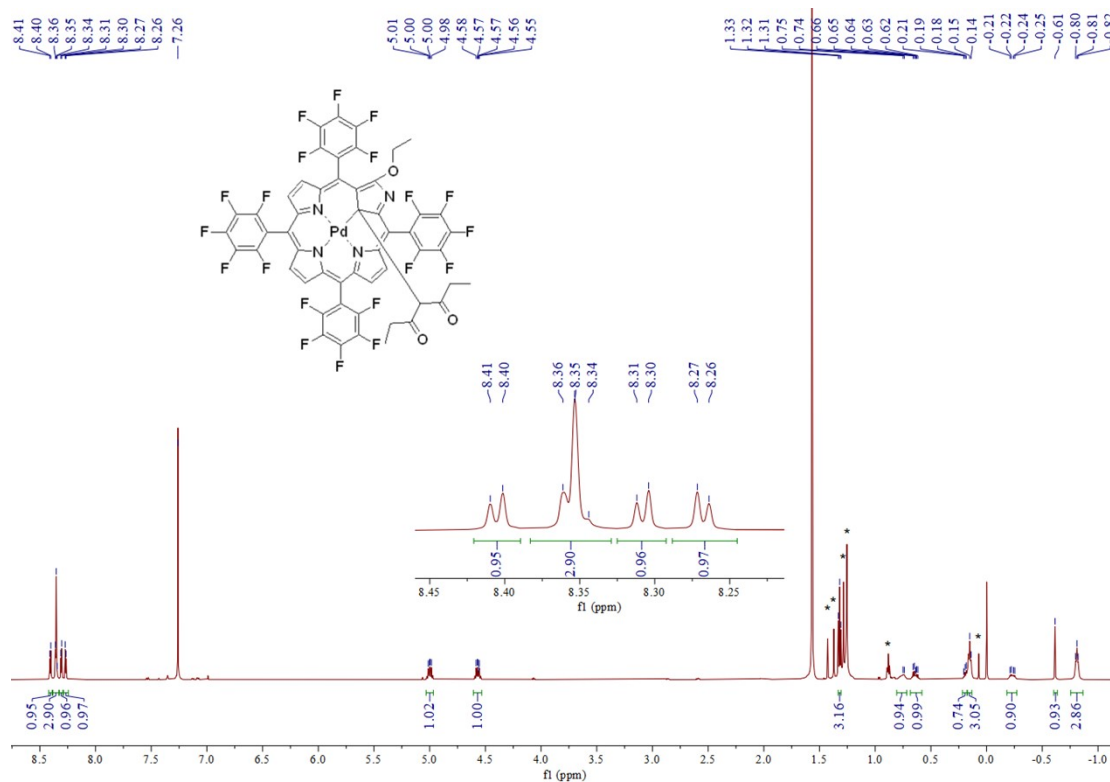

Figure S12.  $^1\text{H}$  NMR (600 MHz,  $\text{CDCl}_3$ ) spectrum of Pd1b. [\*] solvent impurities

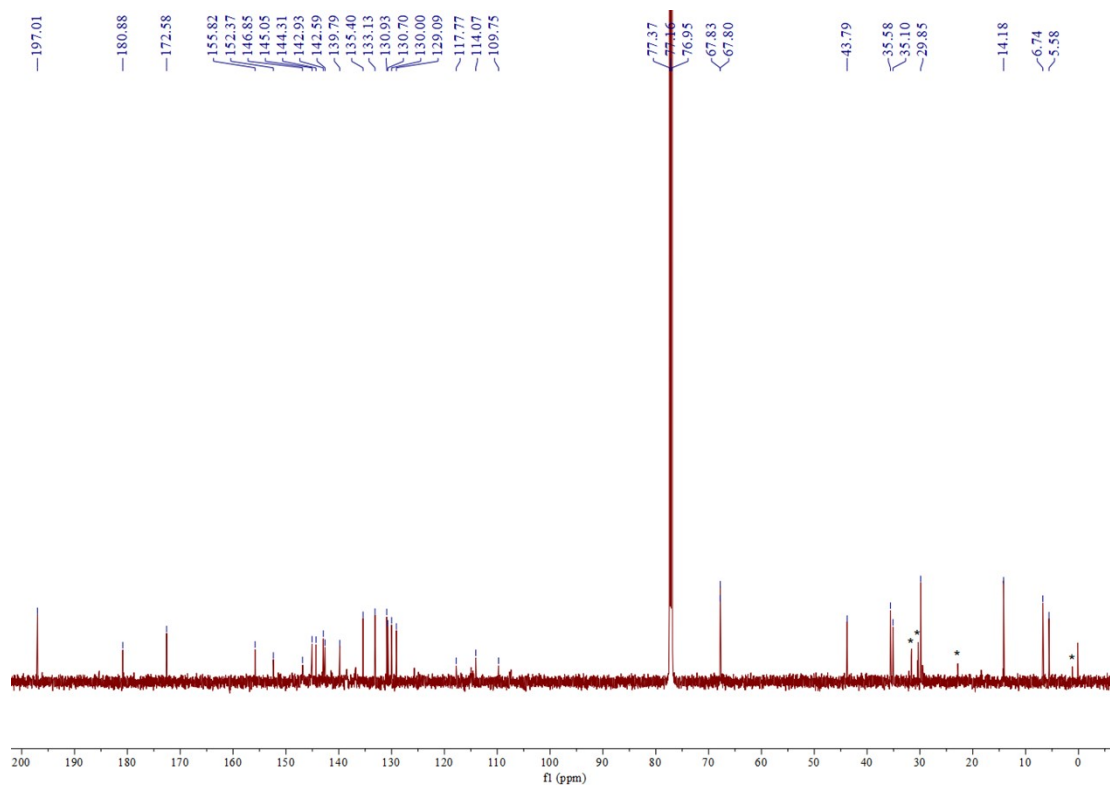

**Figure S13.**  $^{13}\text{C}$  NMR (151 MHz,  $\text{CDCl}_3$ ) spectrum of **Pd1b**. [\*] solvent impurities

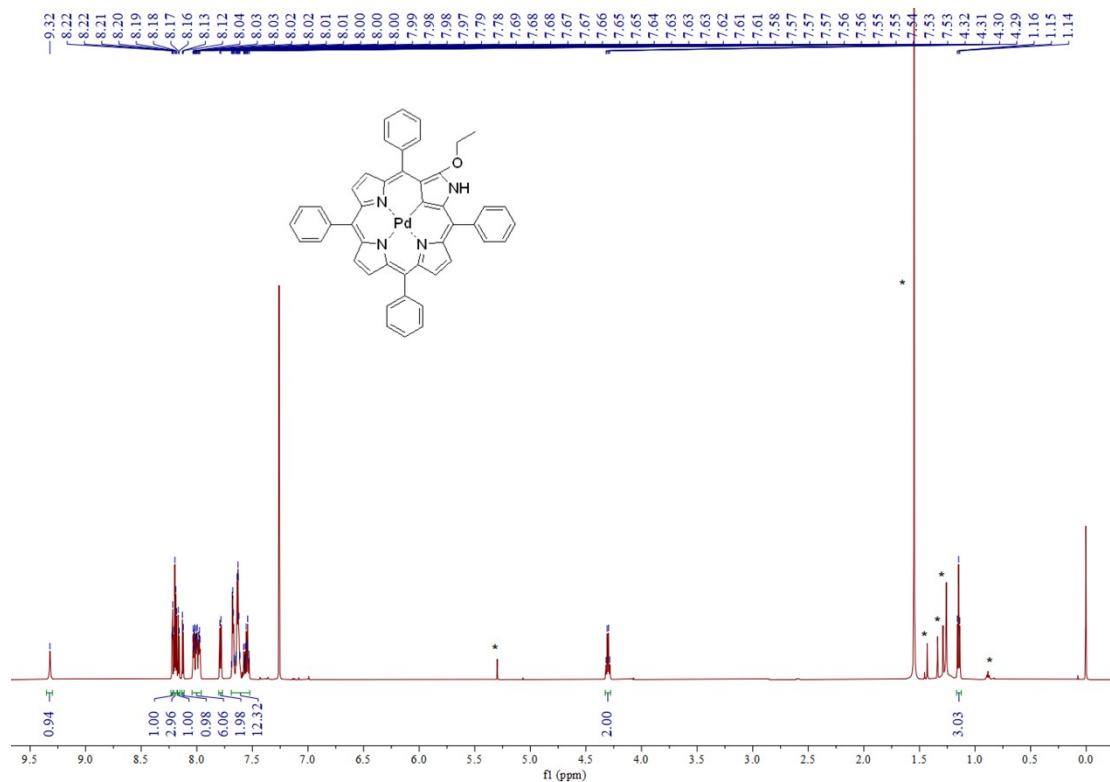

**Figure S14.**  $^1\text{H}$  NMR (600 MHz,  $\text{CDCl}_3$ ) spectrum of **Pd2**. [\*] solvent impurities

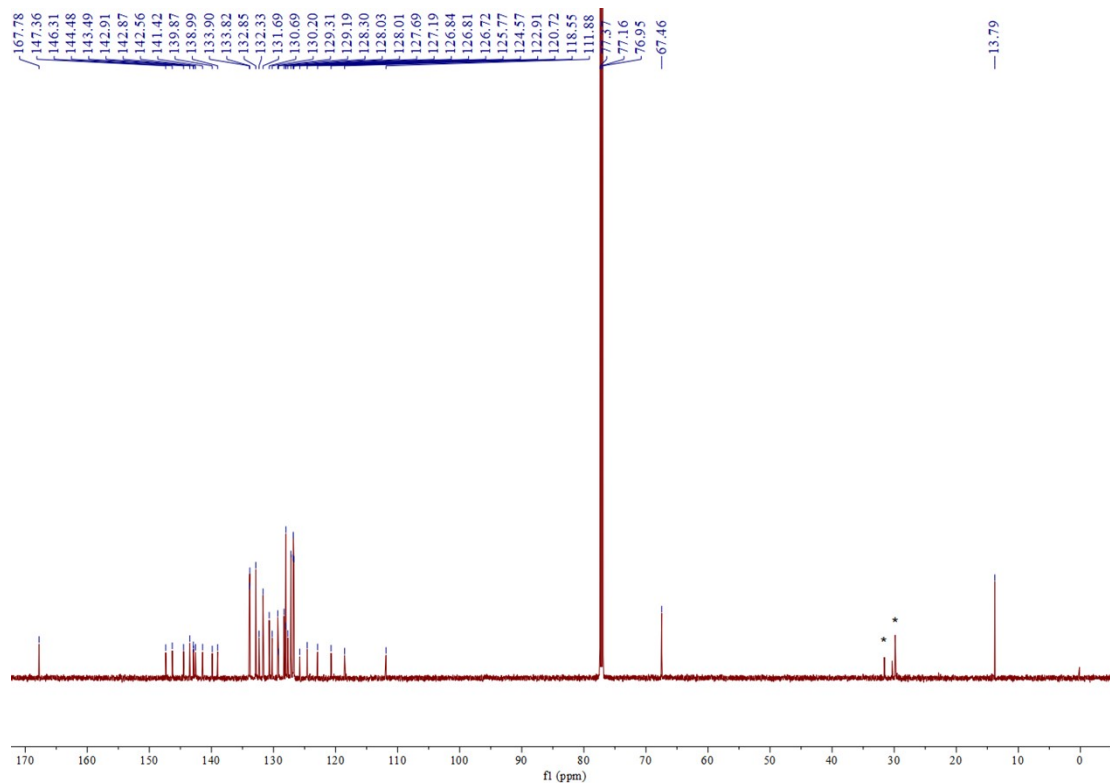

Figure S15.  $^{13}\text{C}$  NMR (151 MHz,  $\text{CDCl}_3$ ) spectrum of Pd2. [\*] solvent impurities

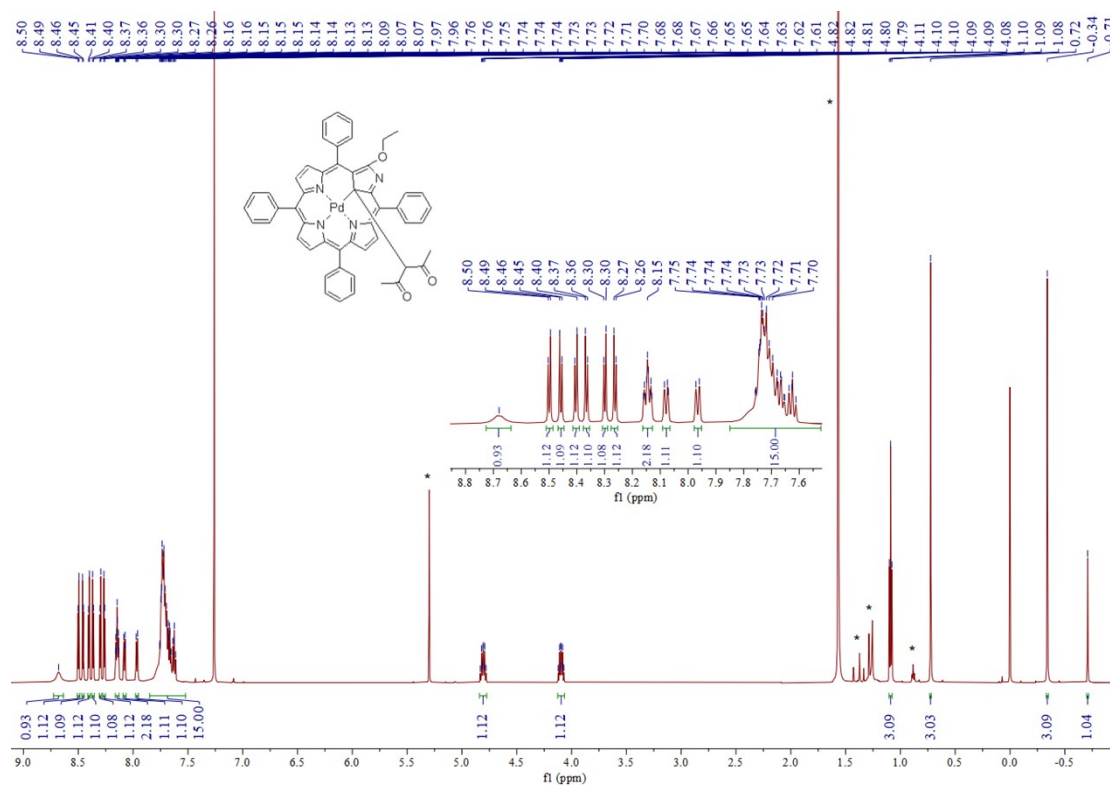

Figure S16.  $^1\text{H}$  NMR (600 MHz,  $\text{CDCl}_3$ ) spectrum of Pd2a. [\*] solvent impurities

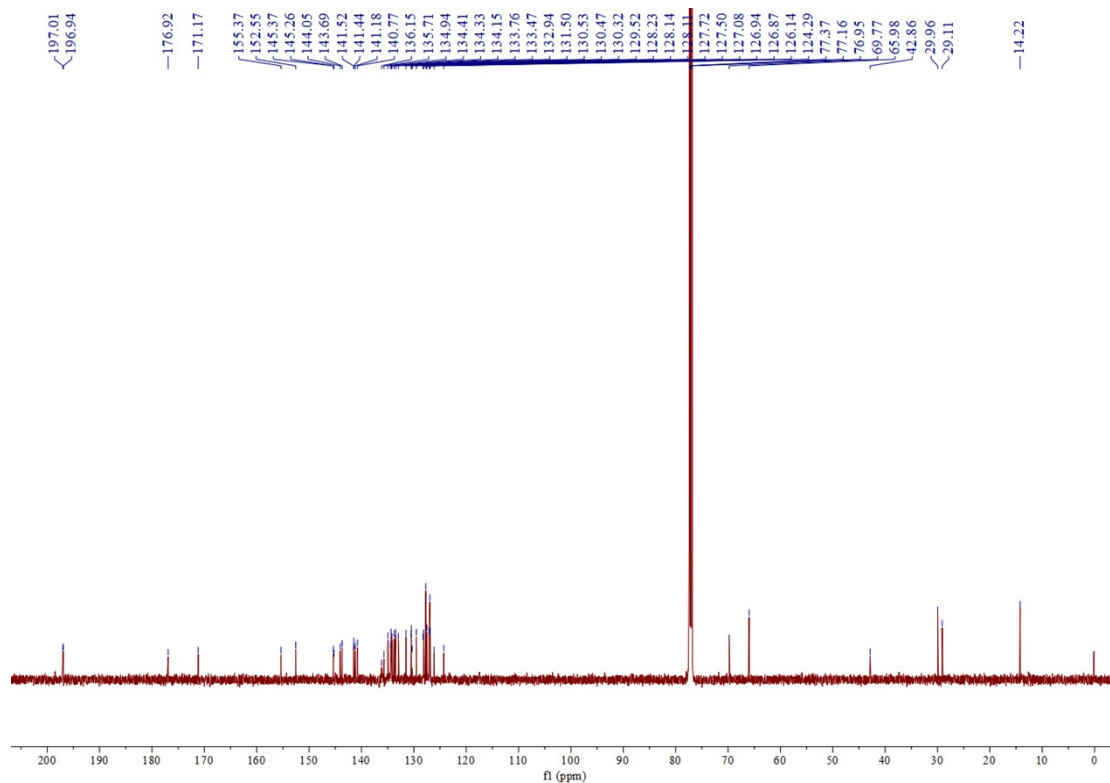

Figure S17.  $^{13}\text{C}$  NMR (151 MHz,  $\text{CDCl}_3$ ) spectrum of Pd2a.

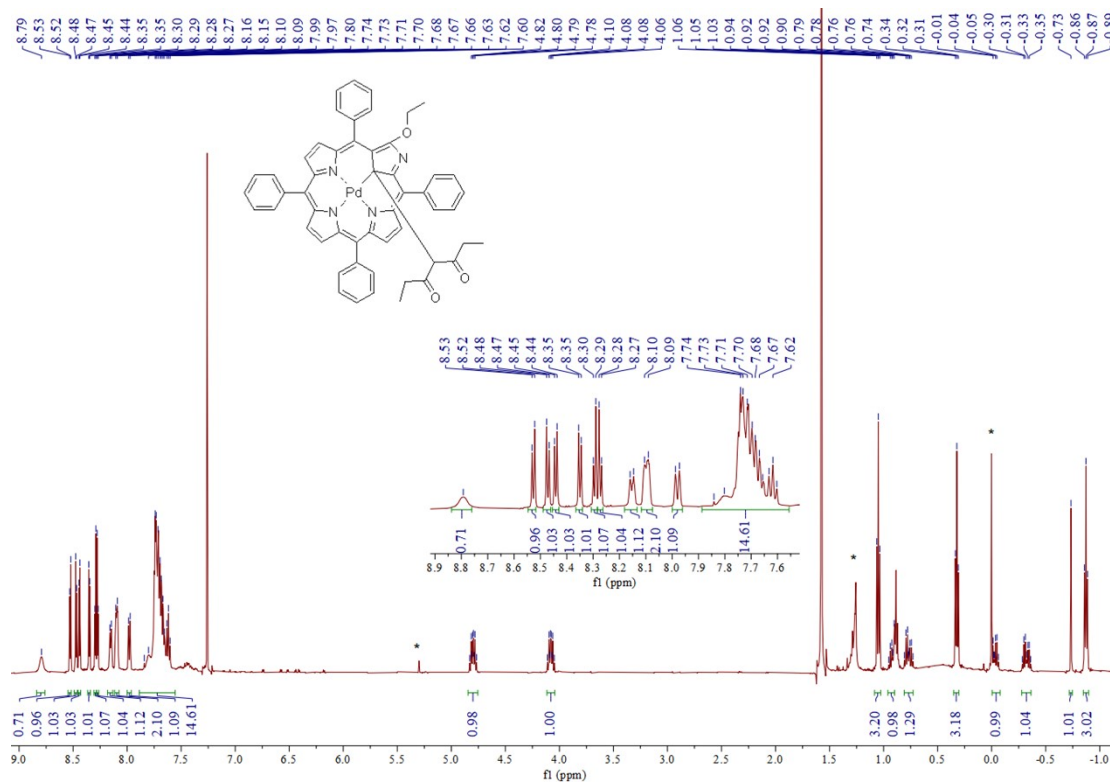

Figure S18.  $^1\text{H}$  NMR (500 MHz,  $\text{CDCl}_3$ ) spectrum of Pd2b. [\*] solvent impurities

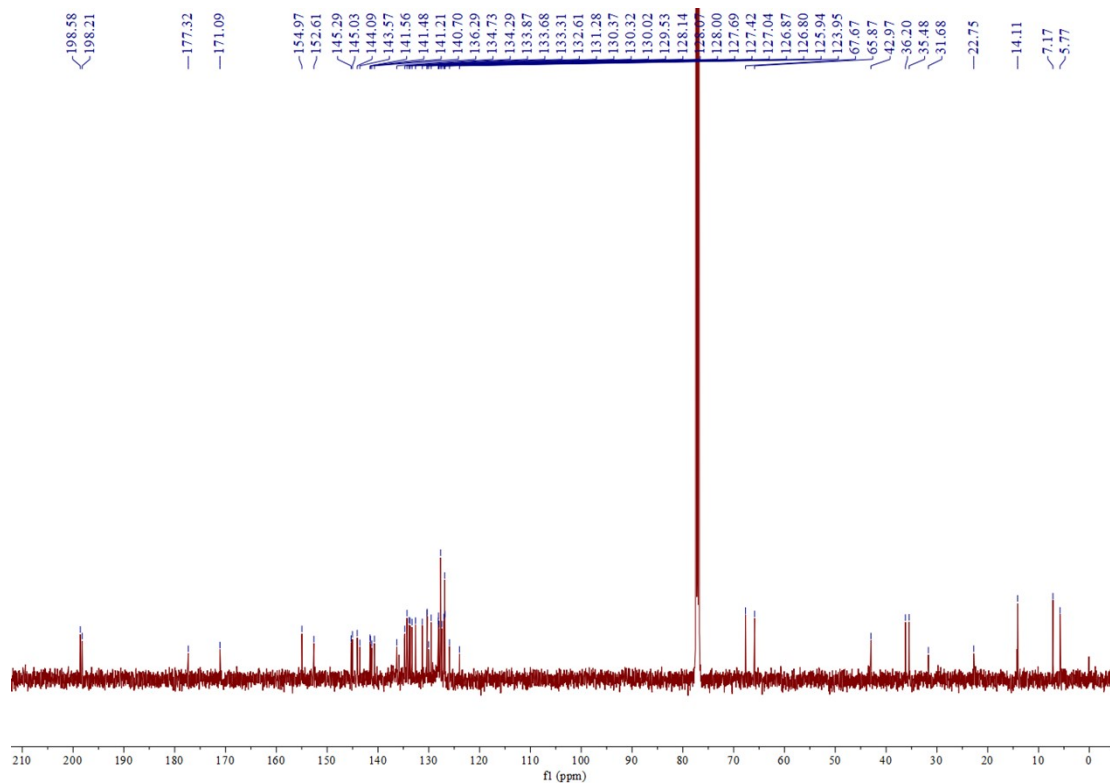

Figure S19.  $^{13}\text{C}$  NMR (126 MHz,  $\text{CDCl}_3$ ) spectrum of Pd2b.

## 6. Mass Spectrum

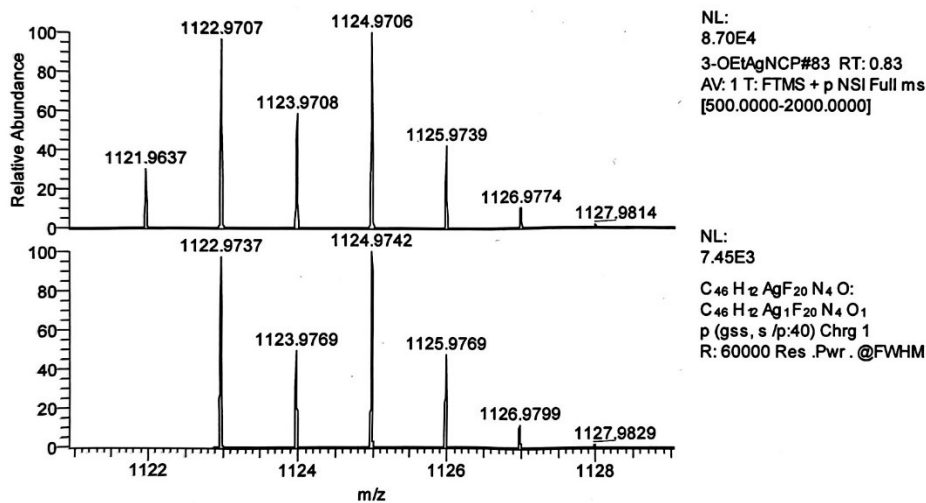

Elemental composition search on mass 1122.9707

m/z = 1117.9707-1127.9707

| m/z       | Theo. Mass | Delta (ppm) | RDB equiv. | Composition                                                         |
|-----------|------------|-------------|------------|---------------------------------------------------------------------|
| 1122.9707 | 1122.9737  | -2.69       | 33.0       | C <sub>46</sub> H <sub>12</sub> O N <sub>4</sub> Ag F <sub>20</sub> |

Figure S20. MALDI TOF mass spectrum of C-3 ethoxy Ag(III) NCP. Simulated (bottom) and observed (top).

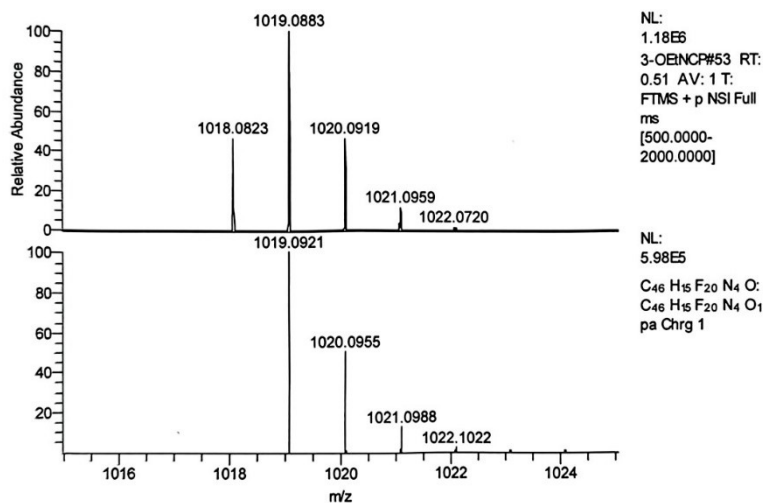

Elemental composition search on mass 1019.0883

m/z= 1014.0883-1024.0883

| m/z       | Theo. Mass | Delta (ppm) | RDB equiv. | Composition                                                      |
|-----------|------------|-------------|------------|------------------------------------------------------------------|
| 1019.0883 | 1019.0921  | -3.77       | 31.5       | C <sub>46</sub> H <sub>15</sub> O N <sub>4</sub> F <sub>20</sub> |

**Figure S21.** MALDI TOF mass spectrum of **C-3 ethoxy NCP**. Simulated (bottom) and observed (top).

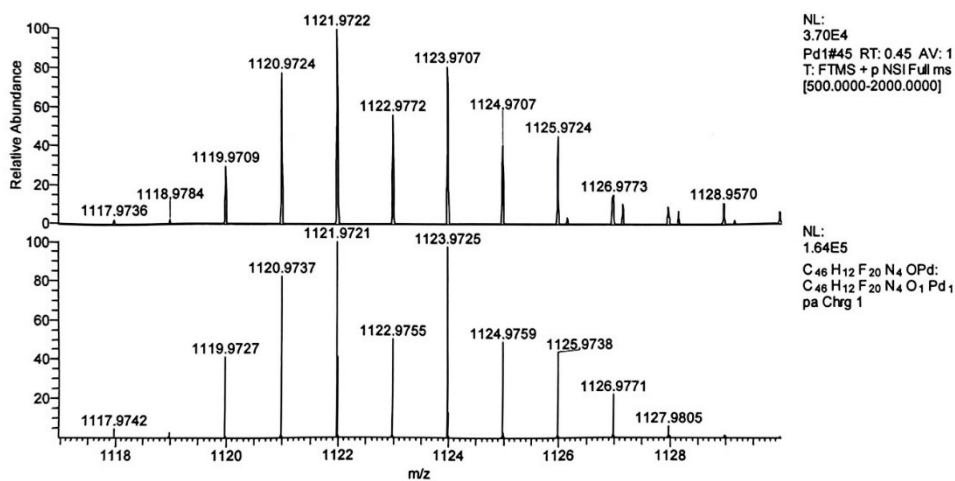

Elemental composition search on mass 1121.9722

m/z= 1116.9722-1126.9722

| m/z       | Theo. Mass | Delta (ppm) | RDB equiv. | Composition                                                         |
|-----------|------------|-------------|------------|---------------------------------------------------------------------|
| 1121.9722 | 1121.9721  | 0.05        | 33.0       | C <sub>46</sub> H <sub>12</sub> O N <sub>4</sub> F <sub>20</sub> Pd |

**Figure S22.** MALDI TOF mass spectrum of **Pd1**. Simulated (bottom) and observed (top).

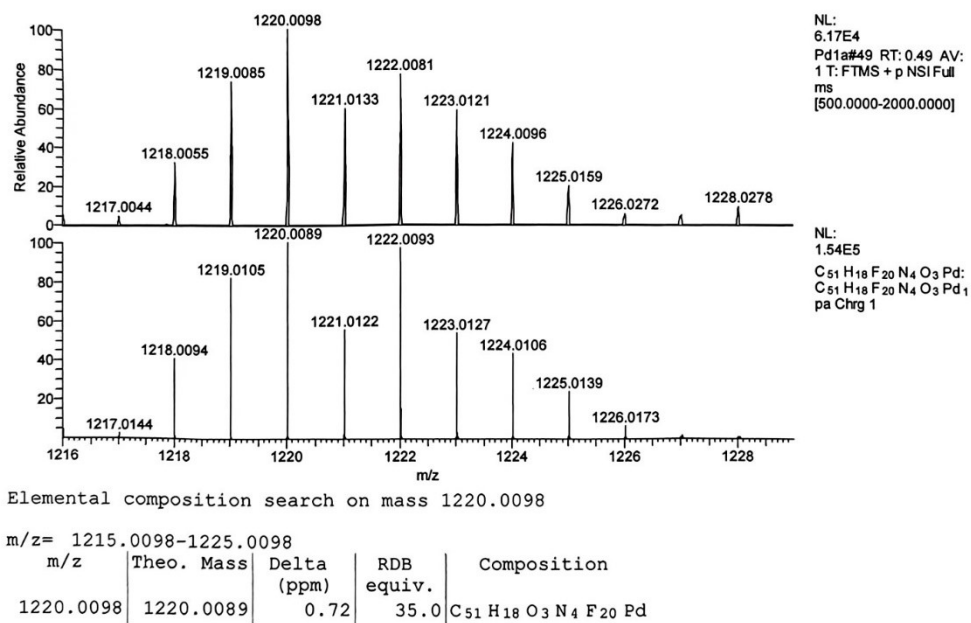

Figure S23. MALDI TOF mass spectrum of Pd1a. Simulated (bottom) and observed (top).

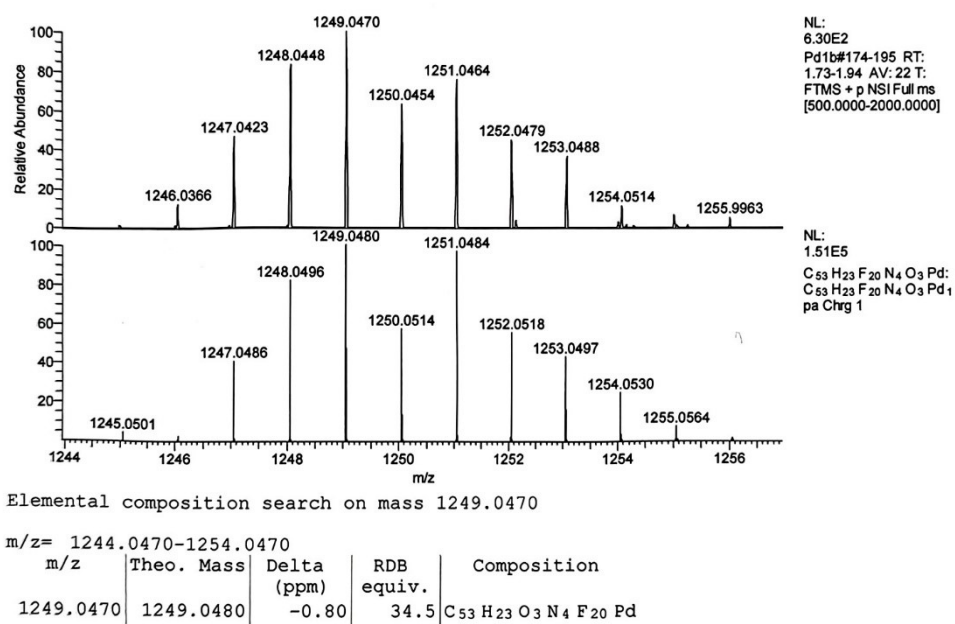

Figure S24. MALDI TOF mass spectrum of Pd1b. Simulated (bottom) and observed (top).

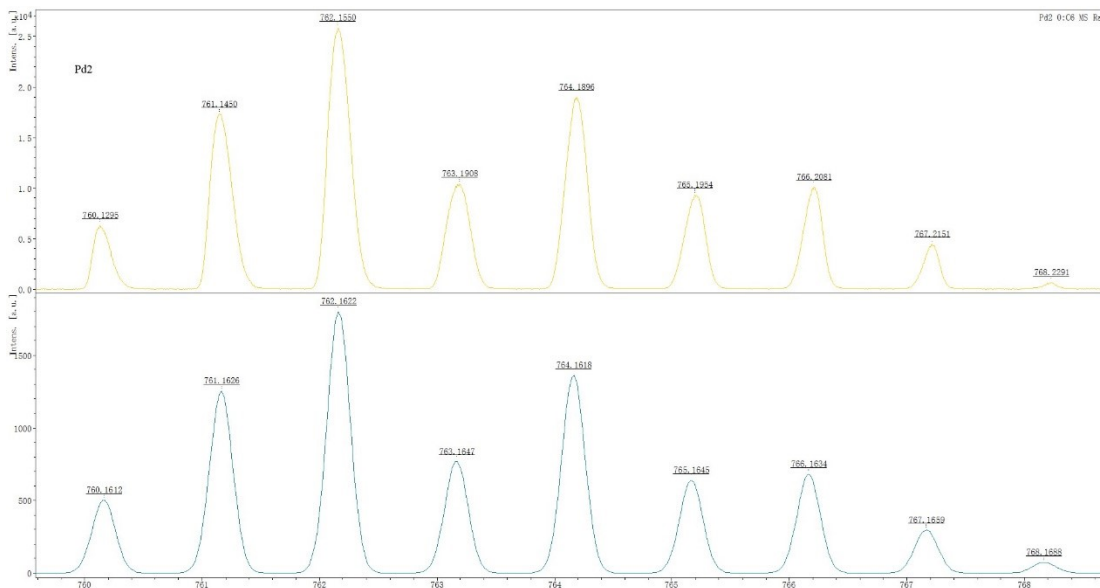

**Figure S25.** MALDI TOF mass spectrum of **Pd2**. Simulated (bottom) and observed (top).

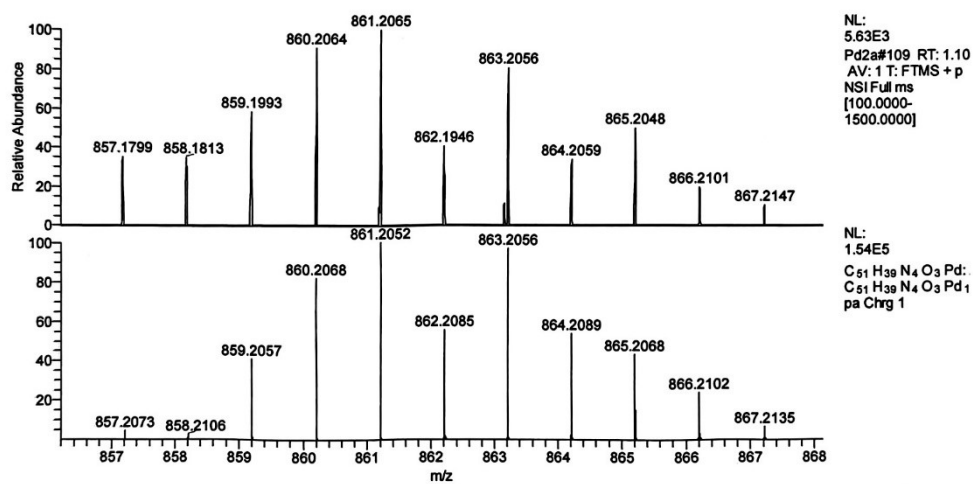

Elemental composition search on mass 861.2065

m/z= 856.2065-866.2065

| m/z      | Theo. Mass | Delta (ppm) | RDB equiv. | Composition                                                      |
|----------|------------|-------------|------------|------------------------------------------------------------------|
| 861.2065 | 861.2052   | 1.54        | 34.5       | C <sub>51</sub> H <sub>39</sub> O <sub>3</sub> N <sub>4</sub> Pd |

**Figure S26.** MALDI TOF mass spectrum of **Pd2a**. Simulated (bottom) and observed (top).

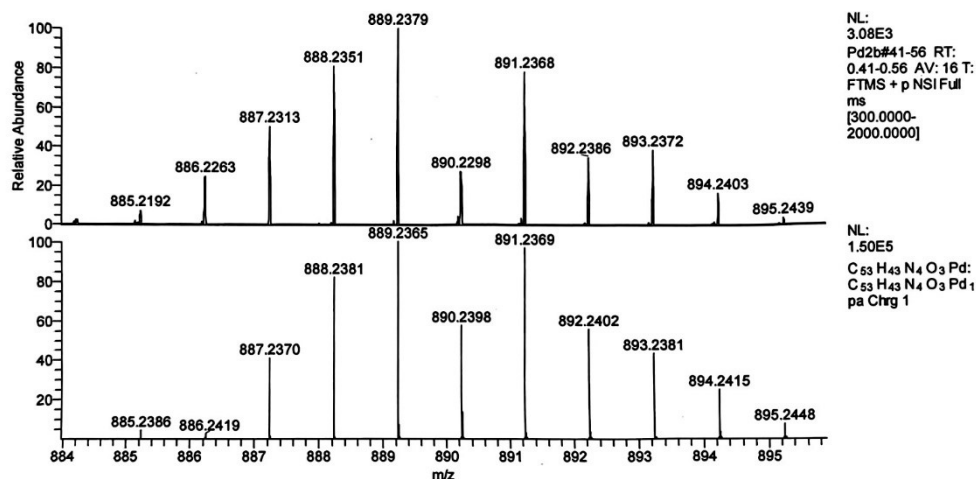

Elemental composition search on mass 889.2379

m/z = 884.2379–894.2379

| m/z      | Theo. Mass | Delta (ppm) | RDB equiv. | Composition                                                      |
|----------|------------|-------------|------------|------------------------------------------------------------------|
| 889.2379 | 889.2365   | 1.67        | 34.5       | C <sub>53</sub> H <sub>43</sub> O <sub>3</sub> N <sub>4</sub> Pd |

**Figure S27.** MALDI TOF mass spectrum of **Pd2b**. Simulated (bottom) and observed (top).

## 7. Electrochemical Properties

Cyclic voltammograms and differential pulse voltammograms were obtained under the following conditions: solvent: CH<sub>2</sub>Cl<sub>2</sub> (Refluxed with CaH<sub>2</sub> under an argon atmosphere for at least 12 h and stored over 3 Å molecular sieves in a glovebox for at least 12 hours. The content of H<sub>2</sub>O was determined by Karl Fischer titration prior to use, which was always lower than 10 ppm.), electrolyte: 0.1 M *n*Bu<sub>4</sub>NPF<sub>6</sub>, working electrode: glassy carbon rod with an inner diameter of 3 mm. Working electrode was polished by 0.05 micron Al<sub>2</sub>O<sub>3</sub> using the US-52 polisher (Electrical equipment Co., TaiSong). Counter electrode: Pt wire. Reference electrode: Ag/AgNO<sub>3</sub> (0.1 M AgNO<sub>3</sub> solution in CH<sub>3</sub>CN), scan rate: 0.05 V/s. Potentials were determined vs ferrocene/ferrocenium ion by differential pulse voltammograms. Temperature: room temperature. All the measurements were taken in a glove box filled with argon.

**Table S2.** First and second oxidation potentials (V vs. Fc/Fc<sup>+</sup>) of **Pd1** and **Pd2** determined by cyclic voltammetry in CH<sub>2</sub>Cl<sub>2</sub>.

| Compounds  | E <sub>OX,1</sub> (V) | E <sub>OX,2</sub> (V) |
|------------|-----------------------|-----------------------|
| <b>Pd1</b> | 0.355                 | 0.787                 |
| <b>Pd2</b> | 0.203                 | 0.759                 |

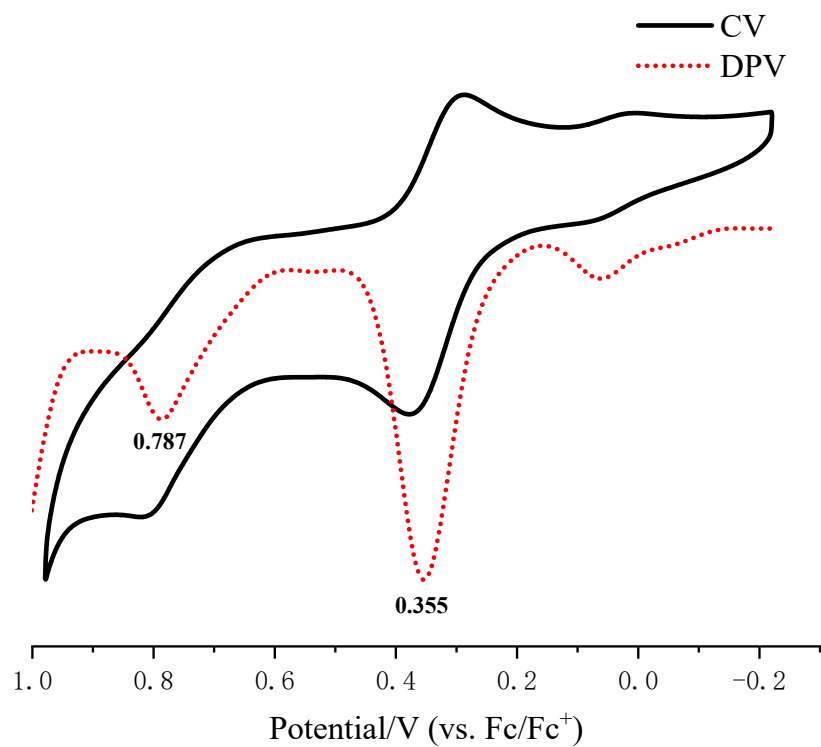

**Figure S28.** Cyclic voltammograms and differential pulse voltammograms of **Pd1**.

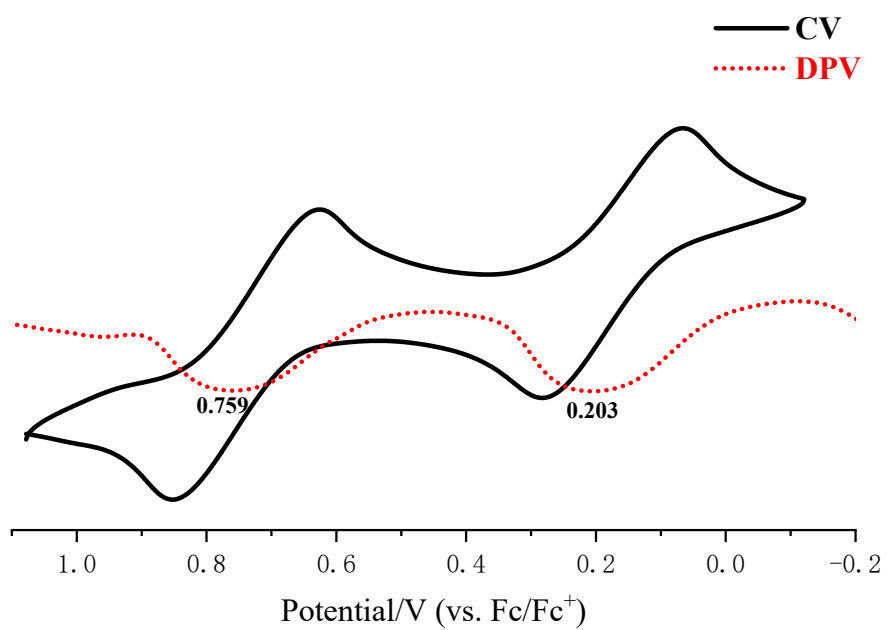

**Figure S29.** Cyclic voltammograms and differential pulse voltammograms of **Pd2**.

## 8. Resonance Hybrid of the Oxidized Intermediate

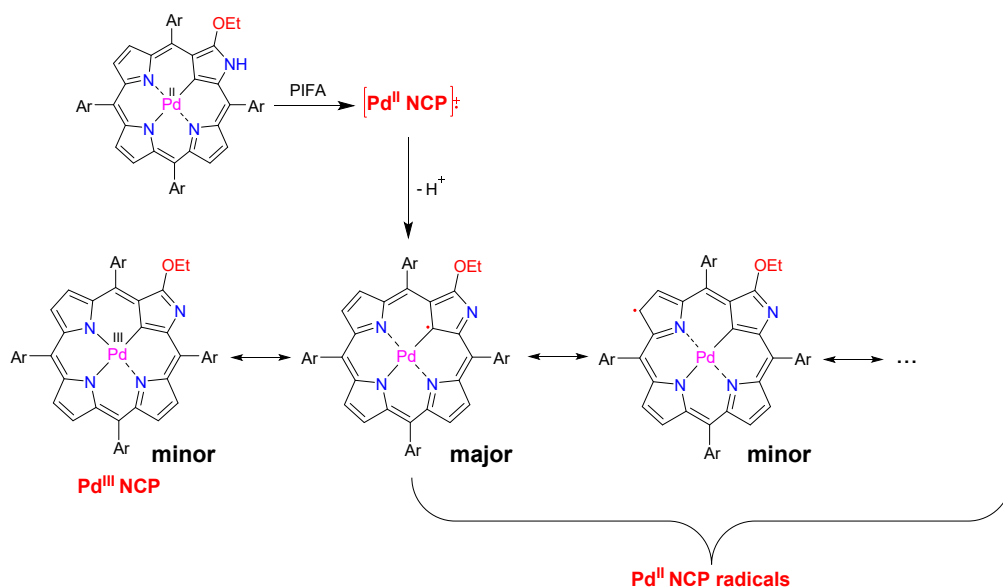

Scheme S9. Resonance hybrid of the oxidized Pd<sup>II</sup> N-confused porphyrin radical.

## 9. Calculations

All the calculations were performed with Gaussian 16 (revision C. 01)<sup>26</sup>. Geometry optimizations were carried out using PBE0-D3(BJ) and a basis set of def2-SVP. Vibrational frequency analysis confirmed that the structure was either a minimum. Solvent effect (solvent = Dichloromethane) was included by single-point energy and Time-Dependent Density Functional Theory (TD-DFT calculations were performed to obtain the lowest 20 singlet excited states and elucidate the transition origins of the UV absorption spectra.) calculation using SMD model and PBE0-D3(BJ)/def2-TZVP. Wavefunction analysis, spin population, and Hirshfeld-I<sup>27</sup> charge analysis were performed using Multiwfn<sup>28, 29</sup> version 2026.3.27. Visualization of spin density and Hirshfeld-I charges was carried out using VMD.<sup>30</sup>

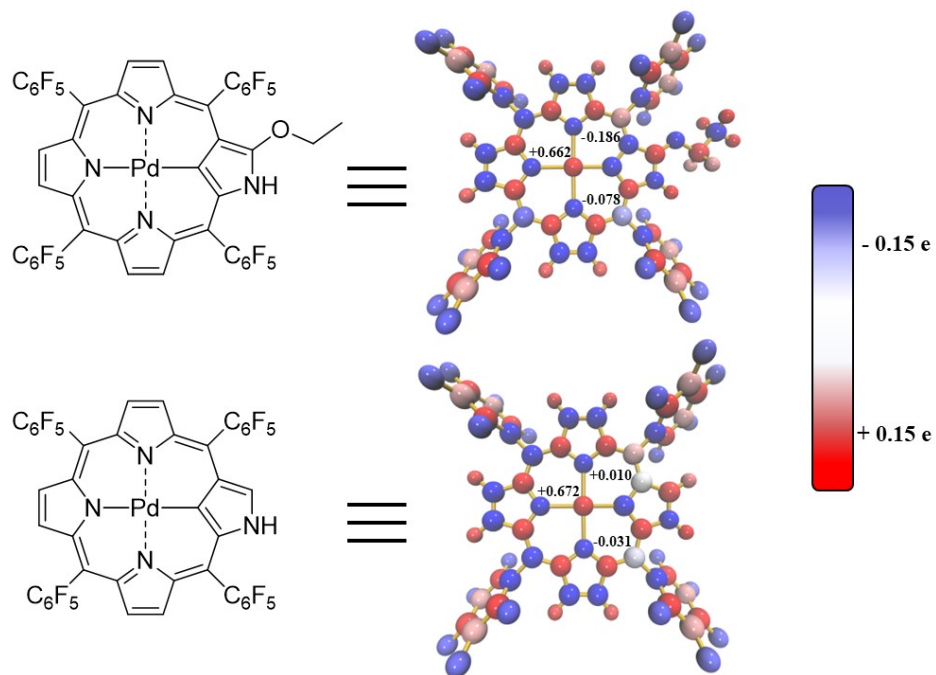

**Figure S30.** Hirshfeld-I charge analysis for **Pd1** and Pd NCP. Scale bar: -0.15 e to 0.15 e (blue: negative; red: positive).

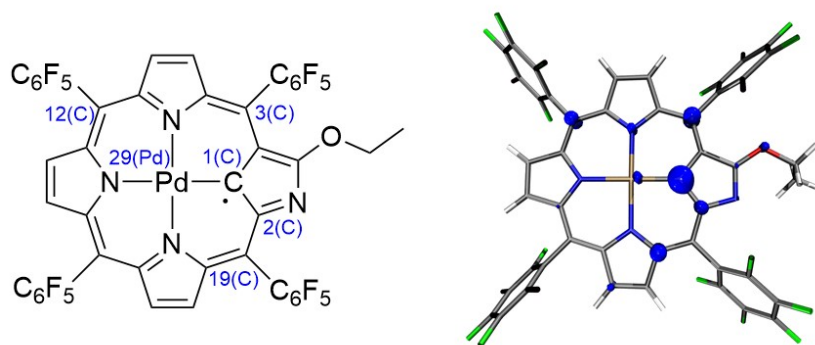

**Figure S31.** Spin density analysis of 3-OEt Pd NCP radical (0.015 of iso value)

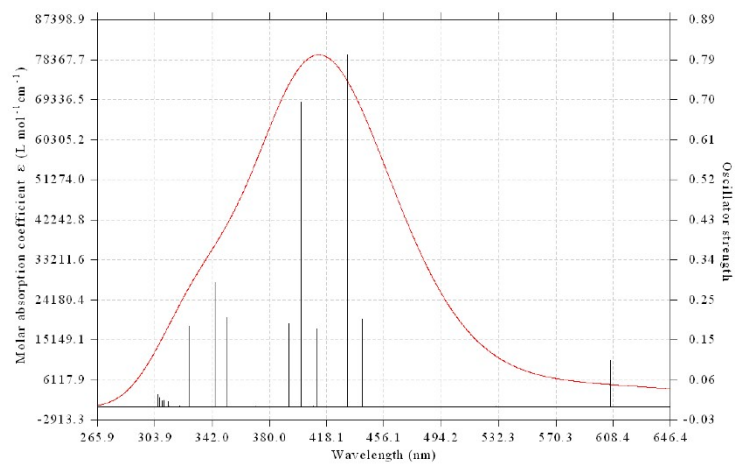

**Figure S32.** Simulated absorption spectrum of **Pd1**

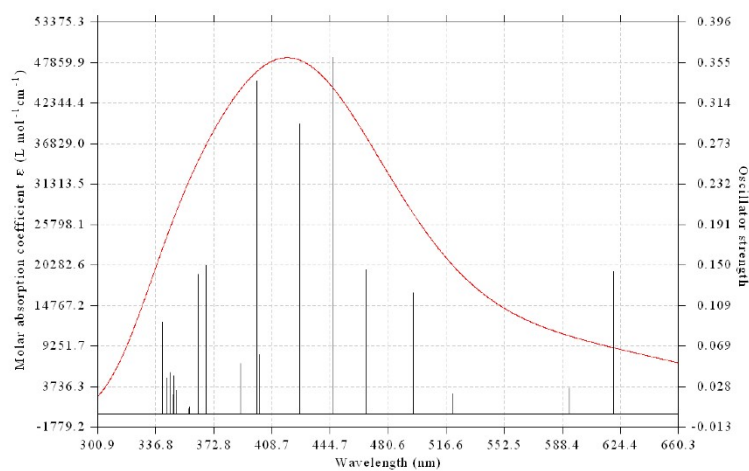

**Figure S33.** Simulated absorption spectrum of **Pd1a**

**Hirshfeld-I charge data for Pd1 (3-OEt Pd NCP) <sup>b</sup>**

| Atom   | Final atomic charges |
|--------|----------------------|
| 1(C)   | 0.07345949           |
| 2(C)   | 0.24519647           |
| 3(C)   | -0.1860687           |
| 4(C)   | -0.20932386          |
| 5(C)   | -0.23792016          |
| 6(C)   | 0.31724493           |
| 7(N)   | -0.42615033          |
| 8(C)   | -0.45849144          |
| 9(C)   | 0.30309117           |
| 10(N)  | -0.61005898          |
| 11(C)  | 0.66984604           |
| 12(C)  | -0.15553666          |
| 13(C)  | 0.3309528            |
| 14(C)  | -0.23084781          |
| 15(C)  | -0.21132679          |
| 16(C)  | 0.30577292           |
| 17(N)  | -0.50101326          |
| 18(C)  | -0.07775594          |
| 19(C)  | 0.26402671           |
| 20(N)  | -0.43216137          |
| 21(C)  | 0.29913083           |
| 22(C)  | -0.24144607          |
| 23(C)  | -0.22355696          |
| 24(C)  | -0.12194355          |
| 25(C)  | -0.29650742          |
| 26(C)  | -0.25462904          |
| 27(C)  | -0.22404555          |
| 28(C)  | -0.23480206          |
| 29(Pd) | 0.66201558           |

|       |             |
|-------|-------------|
| 30(C) | 0.26237778  |
| 31(C) | 0.06584195  |
| 32(C) | 0.14589566  |
| 33(C) | 0.06418981  |
| 34(C) | 0.26081818  |
| 35(C) | 0.25086765  |
| 36(C) | 0.06714345  |
| 37(C) | 0.14485102  |
| 38(C) | 0.06400919  |
| 39(C) | 0.23609139  |
| 40(C) | 0.24702625  |
| 41(C) | 0.06465188  |
| 42(C) | 0.1425086   |
| 43(C) | 0.06458297  |
| 44(C) | 0.24690502  |
| 45(C) | 0.24871003  |
| 46(C) | 0.06413224  |
| 47(C) | 0.1428811   |
| 48(C) | 0.06435414  |
| 49(C) | 0.24977086  |
| 50(F) | -0.11557911 |
| 51(F) | -0.11250538 |
| 52(F) | -0.11177643 |
| 53(F) | -0.12259699 |
| 54(F) | -0.11992504 |
| 55(F) | -0.10921278 |
| 56(F) | -0.11023157 |
| 57(F) | -0.1069266  |
| 58(F) | -0.11504898 |
| 59(F) | -0.12274906 |
| 60(F) | -0.11239847 |
| 61(F) | -0.11508177 |
| 62(F) | -0.11254926 |
| 63(F) | -0.12313974 |
| 64(F) | -0.12241786 |
| 65(F) | -0.11254391 |
| 66(F) | -0.11498366 |
| 67(F) | -0.11239637 |
| 68(F) | -0.12251241 |
| 69(F) | -0.12863632 |
| 70(O) | -0.2753404  |
| 71(C) | 0.13905819  |
| 72(C) | -0.53579755 |
| 73(H) | 0.12739895  |
| 74(H) | 0.1308717   |
| 75(H) | 0.35489831  |
| 76(H) | 0.13079654  |
| 77(H) | 0.12919411  |

|       |            |
|-------|------------|
| 78(H) | 0.1298289  |
| 79(H) | 0.12483166 |
| 80(H) | 0.07296771 |
| 81(H) | 0.07755344 |
| 82(H) | 0.16793813 |
| 83(H) | 0.1546564  |
| 84(H) | 0.15959544 |

**Hirshfeld-I charge data for Pd NCP <sup>b</sup>**

| Atom   | Final atomic charges |
|--------|----------------------|
| 1(C)   | 0.05524615           |
| 2(C)   | 0.23521096           |
| 3(C)   | 0.0099005            |
| 4(C)   | -0.19530891          |
| 5(C)   | -0.24303843          |
| 6(C)   | 0.33291817           |
| 7(N)   | -0.42290685          |
| 8(C)   | -0.50998689          |
| 9(C)   | 0.25945401           |
| 10(N)  | -0.39687818          |
| 11(C)  | 0.13789058           |
| 12(C)  | -0.16783084          |
| 13(C)  | 0.34382082           |
| 14(C)  | -0.22413463          |
| 15(C)  | -0.20997027          |
| 16(C)  | 0.32645042           |
| 17(N)  | -0.51445512          |
| 18(C)  | -0.03089513          |
| 19(C)  | 0.25166531           |
| 20(N)  | -0.42831821          |
| 21(C)  | 0.32053177           |
| 22(C)  | -0.24476825          |
| 23(C)  | -0.2077894           |
| 24(C)  | -0.14653016          |
| 25(C)  | -0.30220409          |
| 26(C)  | -0.2809756           |
| 27(C)  | -0.22619488          |
| 28(C)  | -0.23279028          |
| 29(Pd) | 0.67158749           |
| 30(C)  | 0.25203054           |
| 31(C)  | 0.0657827            |
| 32(C)  | 0.14481289           |
| 33(C)  | 0.06632903           |
| 34(C)  | 0.25771048           |
| 35(C)  | 0.2558547            |
| 36(C)  | 0.06700908           |
| 37(C)  | 0.14625394           |
| 38(C)  | 0.06629306           |

|       |             |
|-------|-------------|
| 39(C) | 0.23985348  |
| 40(C) | 0.24662914  |
| 41(C) | 0.06441455  |
| 42(C) | 0.14257483  |
| 43(C) | 0.06471643  |
| 44(C) | 0.24626229  |
| 45(C) | 0.24729862  |
| 46(C) | 0.06419535  |
| 47(C) | 0.14272242  |
| 48(C) | 0.06435621  |
| 49(C) | 0.24825969  |
| 50(F) | -0.11075607 |
| 51(F) | -0.10895397 |
| 52(F) | -0.10819534 |
| 53(F) | -0.11943489 |
| 54(F) | -0.11906011 |
| 55(F) | -0.10656057 |
| 56(F) | -0.1083043  |
| 57(F) | -0.10534852 |
| 58(F) | -0.1148052  |
| 59(F) | -0.11976928 |
| 60(F) | -0.11032207 |
| 61(F) | -0.11301613 |
| 62(F) | -0.11050234 |
| 63(F) | -0.12083971 |
| 64(F) | -0.11976803 |
| 65(F) | -0.11036125 |
| 66(F) | -0.11286525 |
| 67(F) | -0.11028065 |
| 68(F) | -0.12042008 |
| 69(F) | -0.12443783 |
| 70(H) | 0.12960044  |
| 71(H) | 0.13295454  |
| 72(H) | 0.33749031  |
| 73(H) | 0.13262828  |
| 74(H) | 0.1315069   |
| 75(H) | 0.13204783  |
| 76(H) | 0.12811002  |
| 77(H) | 0.09660375  |

**Spin population analysis of the one-electron-oxidized 3-ethoxy Pd<sup>III</sup> N-confused porphyrin radical. <sup>b</sup>**

| Atom | Spin pop. |
|------|-----------|
| 1(C) | 0.38513   |
| 2(C) | 0.10795   |
| 3(C) | 0.18835   |
| 4(C) | -0.06378  |
| 5(C) | -0.11715  |

|        |          |
|--------|----------|
| 6(C)   | 0.00023  |
| 7(C)   | -0.00722 |
| 8(C)   | -0.0562  |
| 9(N)   | 0.06776  |
| 10(N)  | 0.03001  |
| 11(C)  | 0.07061  |
| 12(C)  | 0.15101  |
| 13(C)  | -0.05345 |
| 14(C)  | 0.0774   |
| 15(C)  | -0.05304 |
| 16(C)  | 0.07126  |
| 17(N)  | 0.00215  |
| 18(C)  | -0.09314 |
| 19(C)  | 0.179    |
| 20(N)  | -0.056   |
| 21(C)  | 0.06742  |
| 22(C)  | 0.08703  |
| 23(C)  | -0.03785 |
| 24(C)  | -0.00791 |
| 25(C)  | -0.01614 |
| 26(C)  | 0.00101  |
| 27(C)  | -0.00972 |
| 28(C)  | -0.00157 |
| 29(Pd) | 0.13765  |
| 30(C)  | 0.00901  |
| 31(C)  | -0.00361 |
| 32(C)  | 0.00646  |
| 33(C)  | -0.00327 |
| 34(C)  | 0.00847  |
| 35(C)  | -0.00257 |
| 36(C)  | 0.00167  |
| 37(C)  | -0.00266 |
| 38(C)  | 0.00172  |
| 39(C)  | -0.00323 |
| 40(C)  | 0.00656  |
| 41(C)  | -0.00191 |
| 42(C)  | 0.00385  |
| 43(C)  | -0.00213 |
| 44(C)  | 0.00476  |
| 45(C)  | -0.00122 |
| 46(C)  | 0.00009  |
| 47(C)  | 0.00003  |
| 48(C)  | 0.00044  |
| 49(C)  | 0.00118  |
| 50(F)  | 0.00057  |
| 51(F)  | -0.00011 |
| 52(F)  | -0.00009 |
| 53(F)  | 0.00026  |

|       |          |
|-------|----------|
| 54(F) | -0.00002 |
| 55(F) | 0.00006  |
| 56(F) | -0.00023 |
| 57(F) | 0.00007  |
| 58(F) | 0.00014  |
| 59(F) | 0.00025  |
| 60(F) | 0.00005  |
| 61(F) | 0.00001  |
| 62(F) | 0.00001  |
| 63(F) | -0.00003 |
| 64(F) | 0.00004  |
| 65(F) | -0.00005 |
| 66(F) | 0.00035  |
| 67(F) | -0.00003 |
| 68(F) | 0.0002   |
| 69(F) | 0.00023  |
| 70(O) | 0.03019  |
| 71(C) | -0.00291 |
| 72(C) | 0.00222  |
| 73(H) | 0.00066  |
| 74(H) | 0.00109  |
| 75(H) | -0.00348 |
| 76(H) | 0.00253  |
| 77(H) | -0.00514 |
| 78(H) | 0.00075  |
| 79(H) | 0.00043  |
| 80(H) | 0.00163  |
| 81(H) | -0.00013 |
| 82(H) | -0.00016 |
| 83(H) | -0.00003 |

b Atom numbering follows the computational output and may differ from the labeling used in the main text.
